# Supplementary material for: Conservatism and novelty in the genetic architecture of adaptation in Heliconius butterflies
Source: PubMed Central journal article supplement — Heredity (Edinb). 2015 Mar 25;114(5):515–24. doi: 10.1038/hdy.2015.22 (PMC4815517; doi:10.1038/hdy.2015.22), 2015-03-25
Supplement: hdy201522x1.pdf [file hdy201522x1.pdf]

# SUPPLEMENTARY INFORMATION

---

## **Conservatism and novelty in the genetic architecture of adaptation in *Heliconius* butterflies**

Bárbara Huber, Annabel Whibley, Yann Le Poul, Nicolas Navarro, Arnaud Martin, Simon Baxter, Abhijeet Shah, Benoît Gilles, Thierry Wirth, W. Owen McMillan, Mathieu Joron.

### **SUPPLEMENTARY METHODS**

#### **GENOTYPING METHODS**

Markers were first amplified in brood parents, then in the progeny when allelic variation was found. Where possible, allelic variation was scored using amplicon length variation in 3% agarose gels stained with SYBR<sup>®</sup>Safe. In the absence of clear size variation, but where Sanger sequencing revealed an appropriate restriction enzyme site difference within the amplicon, size differences in restriction digestion profiles were used to infer genotype. In two cases, competitive allele-specific PCR KASP<sup>™</sup> assays (LGC Genomics, UK) were used, following the manufacturer's protocol, with fluorescence measured in a CFX96 Bio-Rad Real-Time PCR machine. In other cases, direct Sanger sequencing of PCR products was used. A list of the used markers and more details about the genotyping methods are given in Table S3.

#### **PCR CONDITIONS**

Standard PCR master mixes and thermal cycling conditions were used. PCR mixes contained 10–50 ng of genomic DNA, 1X reaction buffer with 2 mM MgCl<sub>2</sub>, 0.1 mM each dNTP, 50 pmol of each primer and 0.25 U DreamTaq polymerase (Fermentas). Thermal cycling conditions were 94°C for 1 min, 35 cycles of 94°C for 15 sec, 55°C annealing for 30 sec, 72°C for 60 sec, and a final extension at 72°C for minutes.

## MULTIVARIATE QUANTITATIVE TRAIT LOCUS (QTL) ANALYSIS

**Mapping colour pattern loci.** Taking distinct nested subsets of Principal Components (PCs) derived from Color Pattern Modelling (CPM) may change genome association profiles slightly. Therefore, to detect the most robust QTL peaks we explored genome association profiles using different subsets of axes by incrementing the number of added PCs. The subset of axes containing all PCs explaining more than 2% of variance in the PCA was chosen. Additionally, we explored subsets that encompassed an increasing number of components accounting for down to 1% of explained variance, which revealed additional suggestive QTLs, especially on linkage groups known to harbour wing patterning loci or QTLs in other species. The effect of an additive colour QTL was estimated using Haley-Knott regression (Haley and Knott, 1992; Knott and Haley, 2000) by fitting the multivariate linear model  $\mathbf{y}_i | \mathbf{M}_i \sim N_q \left( \boldsymbol{\mu} + \sum_c x_{ic} \boldsymbol{\beta}_c + \sum_j p_{ij} \boldsymbol{\beta}_j, \mathbf{S} \right)$  where  $x_{ic}$  is the value of the covariate  $c$  and  $p_{ij} = \Pr(\mathbf{g}_i = j | \mathbf{M}_i)$  is the probability of the QTL genotypes given the flanking markers for individual  $i$  and the  $\boldsymbol{\beta}$  are the  $q$ -dimensional effect of the covariate  $c$  or of the genotype  $j$ . These probabilities were computed using *R/qtl* (Broman *et al.*, 2003) at each centimorgan along the 20 autosomal chromosomes considering a genotyping error rate of  $10^{-3}$  and the Kosambi map function (Broman *et al.*, 2002). Presence of the QTL was evaluated using the Pillai trace criterion (Pillai, 1967). The probabilities associated with its approximated  $F$  statistics were transformed to their negative  $\log_{10}$  to make results comparable with LOD scores (Leamy *et al.*, 2008). All computations for colour pattern QTL mapping were conducted in the *R/shapeQTL* package written by Nicolas Navarro and available under request.

**Genome-wide significance threshold.** Genome-wide significance for the presence of a QTL was evaluated using a permutation approach (Churchill and Doerge, 1994). The trait together with its covariate (sex) was reshuffled among individuals whereas the original genotype probabilities were kept constant. The genome scan was repeated on these data and the maximal score (LOD) was recorded for each of 1000 iterations. We took the 90<sup>th</sup> quantile of that distribution as the 10% genome-wide threshold to detect QTLs, but defined QTLs with  $\text{LOD} \geq 3$  as being suggestive.

**Multiple QTL modeling.** We adopted an approach for model search including or dropping QTLs without any prior on the number of QTLs per chromosome following the approach developed for univariate traits by Broman and collaborators (Broman and Speed, 2002; Manichaikul *et al.*, 2009; Broman and Sen, 2009). Searches were restricted to additive QTLs only. Model choice was based on penalized scores using the  $-\log_{10}$  of the  $P$ -value minus the model complexity times the 5% genome-wide threshold.

**Interval estimates of QTL locations.** To determine the credible intervals around each significant QTL peak, we used the *bayesint* function of *R/qtl* with a coverage probability of 0.95. Coverage of these intervals was proven stable and consistent across a variety of situations (Manichaikul *et al.*, 2006). Intervals were computed from the chromosome profile of the QTL conditional on all other refined QTL positions.

**QTL effects, effect sizes and visualization.** QTL effects were estimated conditional on the covariate (sex) and other QTLs included in the final model using multivariate regression of phenotypes on the backcross parameterization of QTL genotype probabilities. The effect of each colour pattern QTL was visualized within Color Patterning Modeling (CPM).

**Test for epistatic interactions.** Epistatic interactions between the uncovered QTLs were tested for by implementing a multivariate linear model with additive pairwise interaction between the QTLs.

## SUPPLEMENTARY TABLES

**Table S1.** Summary table of major and minor effect wing colour pattern loci mapped in the genus *Heliconius*

| Linkage group | Colour locus <sup>A</sup>              | Causal gene       | Phenotypic effect <sup>B</sup>                         | Species <sup>C</sup>      | Loci interacting epistatically with major effect loci | References                                                                                                                                                                                  |
|---------------|----------------------------------------|-------------------|--------------------------------------------------------|---------------------------|-------------------------------------------------------|---------------------------------------------------------------------------------------------------------------------------------------------------------------------------------------------|
| 1             | <b><i>K, Khw</i></b>                   |                   | White/yellow switch of background elements             | <i>H. melpomene/cydno</i> |                                                       | Jiggins <i>et al.</i> , 2005; Joron <i>et al.</i> , 2006; Kapan, 1998; Kronforst <i>et al.</i> , 2006b; Linares, 1997; Naisbit <i>et al.</i> , 2003                                         |
|               | <b><i>HhK</i></b>                      |                   | White/yellow switch of FW band                         | <i>H. hecale</i>          |                                                       | This study                                                                                                                                                                                  |
|               |                                        |                   | Quantitative FW pattern variation                      | <i>H. numata</i>          |                                                       | Jones <i>et al.</i> , 2011                                                                                                                                                                  |
| 2             |                                        |                   | Red FW band shape                                      | <i>H. melpomene</i>       |                                                       | Baxter <i>et al.</i> , 2008a                                                                                                                                                                |
|               | *                                      |                   | Red patterns on both FW and HW                         | <i>H. erato</i>           |                                                       | Nadeau <i>et al.</i> , 2014                                                                                                                                                                 |
| 7             |                                        |                   | Red FW band shape                                      | <i>H. melpomene</i>       |                                                       | Baxter <i>et al.</i> , 2008a                                                                                                                                                                |
| 10            | <b><i>Sd, HeSd, St, Ly, c-spot</i></b> | <i>WntA</i>       | Length and shape of yellow FW patch                    | <i>H. erato/himera</i>    | <i>HeD, Cr</i>                                        | Kapan <i>et al.</i> , 2006; Kronforst <i>et al.</i> , 2006a; Mallet, 1989; Martin <i>et al.</i> , 2012; Nadeau <i>et al.</i> 2014; Papa <i>et al.</i> , 2013; Sheppard <i>et al.</i> , 1985 |
|               | <b><i>Ac, HmAc</i></b>                 | <i>WntA</i>       | Shape of FW medial band and discal "hourglass" pattern | <i>H. melpomene</i>       |                                                       | Jiggins <i>et al.</i> , 2005; Kronforst <i>et al.</i> , 2006a; Martin <i>et al.</i> , 2012; Nijhout <i>et al.</i> , 1990; Sheppard <i>et al.</i> , 1985                                     |
|               | <b><i>Ac, Ps</i></b>                   | <i>WntA</i>       | Discal "hourglass" pattern of FW and width of HW bar   | <i>H. cydno/pachinus</i>  |                                                       | Gallant <i>et al.</i> , 2014; Gilbert, 2003; Kronforst <i>et al.</i> , 2006a; Martin <i>et al.</i> , 2012; Nijhout <i>et al.</i> , 1990                                                     |
|               | <b><i>HhAc</i></b>                     | <i>WntA</i>       | Melanisation close to FW discal cell                   | <i>H. hecale</i>          | Hspot                                                 | This study                                                                                                                                                                                  |
|               | <b><i>HiAc</i></b>                     | <i>WntA</i>       | Melanisation close to FW discal cell                   | <i>H. ismenius</i>        |                                                       | This study                                                                                                                                                                                  |
|               | *                                      |                   | Yellow HW band                                         | <i>H. erato</i>           |                                                       | Nadeau <i>et al.</i> , 2014                                                                                                                                                                 |
|               |                                        |                   | Quantitative FW and HW pattern variation               | <i>H. numata</i>          |                                                       | Jones <i>et al.</i> , 2011                                                                                                                                                                  |
|               |                                        | Red FW band shape | <i>H. melpomene</i>                                    |                           | Baxter <i>et al.</i> , 2008a                          |                                                                                                                                                                                             |

Table S1. Continued

| Linkage group | Colour locus <sup>A</sup> | Causal gene                     | Phenotypic effect <sup>B</sup>                   | Species <sup>C</sup>      | Loci interacting epistatically with major effect loci | References                                                                                                                                                                                                                                                                                  |
|---------------|---------------------------|---------------------------------|--------------------------------------------------|---------------------------|-------------------------------------------------------|---------------------------------------------------------------------------------------------------------------------------------------------------------------------------------------------------------------------------------------------------------------------------------------------|
| 13            | <i>Ro</i>                 |                                 | Rounding of the distal edge of the upper FW band | <i>H. erato</i>           |                                                       | Nadeau <i>et al.</i> , 2014                                                                                                                                                                                                                                                                 |
|               |                           |                                 | Red FW band shape                                | <i>H. melpomene</i>       |                                                       | Baxter <i>et al.</i> , 2008a                                                                                                                                                                                                                                                                |
| 15            | <b>Supergene P</b>        |                                 | Whole FW and HW variation                        | <i>H. numata</i>          |                                                       | Jones <i>et al.</i> , 2011; Joron <i>et al.</i> , 2006                                                                                                                                                                                                                                      |
|               | <b>Cr</b>                 |                                 | HW yellow bar                                    | <i>H. erato/himera</i>    | <i>HeD, Sd</i> , non mapped modifiers                 | Counterman <i>et al.</i> , 2010; Kronforst <i>et al.</i> , 2006a; Jiggins and McMillan, 1997; Joron <i>et al.</i> , 2006; Mallet, 1989; Papa <i>et al.</i> , 2008; Sheppard <i>et al.</i> , 1985; Tobler <i>et al.</i> , 2004                                                               |
|               |                           |                                 | White HW margin                                  | <i>H. erato/himera</i>    |                                                       |                                                                                                                                                                                                                                                                                             |
|               |                           |                                 | Medial yellow FW band                            | <i>H. erato/himera</i>    |                                                       |                                                                                                                                                                                                                                                                                             |
|               | <b>Yb, HmYb, Cs</b>       |                                 | Yellow HW bar                                    | <i>H. melpomene/cydno</i> | <i>Br</i>                                             | Emsley, 1964; Ferguson <i>et al.</i> , 2010; Kronforst <i>et al.</i> , 2006a; Jiggins <i>et al.</i> , 2005; Joron <i>et al.</i> , 2006; Linares, 1997; Mallet, 1989; Nadeau <i>et al.</i> , 2014; Naisbit <i>et al.</i> , 2003; Nijhout <i>et al.</i> , 1990; Sheppard <i>et al.</i> , 1985 |
|               |                           |                                 | Pink/orange switch on ventral side of FW band    | <i>H. melpomene</i>       |                                                       | Baxter <i>et al.</i> , 2008a                                                                                                                                                                                                                                                                |
|               | <b>Sb</b>                 |                                 | White or yellow HW margin                        | <i>H. melpomene/cydno</i> | Non mapped locus <i>L</i>                             | Emsley, 1964; Ferguson <i>et al.</i> , 2010; Jiggins <i>et al.</i> , 2005; Joron <i>et al.</i> , 2006; Linares, 1996; Linares, 1997; Naisbit <i>et al.</i> , 2003                                                                                                                           |
|               | <b>Hspot</b>              |                                 | Marginal spots on HW                             | <i>H. hecale</i>          | <i>HhAc</i>                                           | This study                                                                                                                                                                                                                                                                                  |
|               | <b>N</b>                  |                                 | Yellow colour in the medial FW band              | <i>H. melpomene</i>       | <i>HmB, HmD</i>                                       | Mallet, 1989; Nadeau <i>et al.</i> , 2014; Sheppard <i>et al.</i> , 1985                                                                                                                                                                                                                    |
|               | <b>HhN</b>                |                                 | Subapical row of spots on FW                     | <i>H. hecale</i>          |                                                       | This study                                                                                                                                                                                                                                                                                  |
| <b>HiN</b>    |                           | Shape of distal edge of FW band | <i>H. ismenius</i>                               |                           | This study                                            |                                                                                                                                                                                                                                                                                             |
| <b>Fspot</b>  |                           | Apical row of spots on FW       | <i>H. hecale</i>                                 |                           | This study                                            |                                                                                                                                                                                                                                                                                             |

Table S1. Continued

| Linkage group | Colour locus <sup>A</sup>    | Causal gene                       | Phenotypic effect <sup>B</sup>                            | Species <sup>C</sup>               | Loci interacting epistatically with major effect loci | References                                                                                                                                                                                                                                                                                       |
|---------------|------------------------------|-----------------------------------|-----------------------------------------------------------|------------------------------------|-------------------------------------------------------|--------------------------------------------------------------------------------------------------------------------------------------------------------------------------------------------------------------------------------------------------------------------------------------------------|
| 17            | *                            |                                   | Yellow HW bar                                             | <i>H. erato</i>                    |                                                       | Nadeau <i>et al.</i> , 2014                                                                                                                                                                                                                                                                      |
| 18            | <b>HeD, D, DRY</b>           | <i>optix</i>                      | Red FW "dennis"                                           | <i>H. erato/himera</i>             | <i>Sd, Cr</i> , non mapped modifiers                  | Baxter <i>et al.</i> , 2008b; Counterman <i>et al.</i> , 2010; Jiggins and McMillan, 1997; Kapan, 2006; Mallet, 1989; Martin <i>et al.</i> , 2014; Nadeau <i>et al.</i> , 2014; Papa <i>et al.</i> , 2008; Reed <i>et al.</i> , 2011; Sheppard <i>et al.</i> , 1985; Tobler <i>et al.</i> , 2005 |
|               |                              | <i>optix</i>                      | Red HW rays                                               | <i>H. erato/himera</i>             |                                                       |                                                                                                                                                                                                                                                                                                  |
|               |                              | <i>optix</i>                      | Red/yellow FW                                             | <i>H. erato/himera</i>             |                                                       |                                                                                                                                                                                                                                                                                                  |
|               | <b>HmD, D</b>                | <i>optix</i>                      | Red HW "rays" and proximal "dennis" patches on both wings | <i>H. melpomene</i>                | <i>N</i>                                              | Baxter <i>et al.</i> , 2008b; Mallet, 1989; Nadeau <i>et al.</i> , 2014; Reed <i>et al.</i> , 2011; Sheppard <i>et al.</i> , 1985; Turner and Crane, 1962                                                                                                                                        |
|               | <b>HmB, B</b>                | <i>optix</i>                      | Red medial FW band                                        | <i>H. melpomene</i>                | <i>N</i>                                              | Baxter <i>et al.</i> , 2008b; Mallet, 1989; Martin <i>et al.</i> , 2014; Reed <i>et al.</i> , 2011; Sheppard, 1985; Turner and Crane, 1962; Turner, 1972                                                                                                                                         |
|               | <b>Br, "forceps" shutter</b> | <i>optix</i>                      | Brown oval pattern on the ventral side of the HW          | <i>H. cydno/pachinus</i>           | <i>Yb</i>                                             | Chamberlain <i>et al.</i> , 2011; Gilbert, 2003; Naisbit <i>et al.</i> , 2003; Reed <i>et al.</i> , 2011                                                                                                                                                                                         |
|               | <b>HhBr</b>                  |                                   | Shape of marginal black band on HW                        | <i>H. hecale</i>                   |                                                       | This study                                                                                                                                                                                                                                                                                       |
|               | <b>HiBr</b>                  |                                   | Shape of marginal black band on HW                        | <i>H. ismenius</i>                 |                                                       | This study                                                                                                                                                                                                                                                                                       |
|               | <i>G, basal red</i>          | <i>optix</i>                      | Basal HW red spots and basal FW small bar                 | <i>H. melpomene/cydno/pachinus</i> |                                                       | Chamberlain <i>et al.</i> , 2011; Gilbert, 2003; Kronforst <i>et al.</i> , 2006a; Linares, 1996; Martin <i>et al.</i> , 2014; Naisbit <i>et al.</i> , 2003                                                                                                                                       |
|               | <i>Wh</i> (possibly)         |                                   | White/yellow switch of FW band                            | <i>H. erato/himera</i>             |                                                       | Papa <i>et al.</i> , 2013; Sheppard <i>et al.</i> , 1985                                                                                                                                                                                                                                         |
|               | <b>Cm</b>                    |                                   | HW and proximal FW melanisation                           | <i>H. hecale</i>                   |                                                       | This study                                                                                                                                                                                                                                                                                       |
|               |                              | Middle FW band size and shape     | <i>H. erato/himera</i>                                    |                                    | Papa <i>et al.</i> , 2013                             |                                                                                                                                                                                                                                                                                                  |
|               |                              | Quantitative FW pattern variation | <i>H. numata</i>                                          |                                    | Jones <i>et al.</i> , 2011                            |                                                                                                                                                                                                                                                                                                  |
| 19            |                              |                                   | Quantitative FW pattern variation                         | <i>H. numata</i>                   |                                                       | Jones <i>et al.</i> , 2011                                                                                                                                                                                                                                                                       |

**Table S1. Continued**

| Linkage group    | Colour locus <sup>A</sup> | Causal gene | Phenotypic effect <sup>B</sup>           | Species <sup>C</sup>   | Loci interacting epistatically with major effect loci | References                   |
|------------------|---------------------------|-------------|------------------------------------------|------------------------|-------------------------------------------------------|------------------------------|
| Sex Z chromosome |                           |             | Red FW band shape                        | <i>H. melpomene</i>    |                                                       | Baxter <i>et al.</i> , 2008a |
|                  |                           |             | FW band shape                            | <i>H. erato</i>        |                                                       | Mallet, 1989                 |
|                  |                           |             | "Whiteness" (or "yellowness") of FW band | <i>H. erato/himera</i> |                                                       | Papa <i>et al.</i> , 2013    |
|                  |                           |             | Quantitative FW and HW pattern variation | <i>H. numata</i>       |                                                       | Jones <i>et al.</i> , 2011   |

<sup>A</sup>Some loci have alternative names separated by commas. The name of major effect loci is written in bold script. QTLs that were named in this study are written in non-italic script.

<sup>B</sup>Abbreviations FW and HW correspond to forewing(s) and hindwing(s), respectively.

<sup>C</sup>Species in which a given locus was described. Slashes separate species that were intercrossed to infer gene homology.

\*Low confidence genotype-to-phenotype association.

**Table S2.** Sampling localities for the specimens of *Heliconius hecale* and *H. ismenius* used in the crosses

| <b>Species</b>             | <b>Race</b>      | <b>Country</b> | <b>Locality</b>         | <b>GPS coordinates</b> |
|----------------------------|------------------|----------------|-------------------------|------------------------|
| <i>Heliconius hecale</i>   | <i>melicerta</i> | Panamá         | Gamboa, Colón           | N9°7.257, W79°43.591   |
|                            | <i>zuleika</i>   | Panamá         | Miramar, Bocas del Toro | N8°59.369, W82°14.597  |
|                            | <i>clearei</i>   | Venezuela      | Tumeremo, Bolívar       | N6°50.185, W61°35.554  |
| <i>Heliconius ismenius</i> | <i>boulleti</i>  | Panamá         | Yaviza, Darién          | N8°16.783, W77°48.589  |
|                            | <i>telchinia</i> | Panamá         | Miramar, Bocas del Toro | N8°59.369, W82°14.597  |



**Table S3.** List of markers used to fine-map colour loci in *H. hecale* and *H. ismenius*

| Marker name                    | Marker type<br>(Annotation on <i>H. melpomene</i> genome) | Scaffold<br>(starting position on <i>H. melpomene</i> genome) | Primer sequence             | Genotyping method<br>(enzyme)                          | Genotyped brood(s)    |
|--------------------------------|-----------------------------------------------------------|---------------------------------------------------------------|-----------------------------|--------------------------------------------------------|-----------------------|
| <b>Around <i>HhK</i></b>       |                                                           |                                                               |                             |                                                        |                       |
| KASP_Wg                        | SNP                                                       | HE671174 (588001)                                             | NA <sup>7</sup>             | KASP <sup>TM</sup> assays <sup>6</sup>                 | Br112, Br117          |
| Wingless_F1                    | EPIC <sup>1</sup> ( <i>HMEL022601</i> )                   | HE671174 (1166344)                                            | ATGCTAGTATCGTTGCAGGC        | Sanger sequencing                                      | Br112                 |
| Wingless_R1                    |                                                           | HE671174 (1167592)                                            | CACAACAATGAAGCCGGCAG        |                                                        |                       |
| scf670889_gen0_F3              | Non-coding                                                | HE670889 (74431)                                              | GACATCTCTGAGTGTGAC          | dCAPS <sup>2</sup> ( <i>EcoRI</i> )                    | Br112                 |
| scf670889_gen0_R3a             |                                                           | HE670889 (75124)                                              | ACGCGAGCTTCATTCCGCGA        |                                                        |                       |
| KASP_Trib2                     | SNP                                                       | HE670375 (50059)                                              | NA <sup>7</sup>             | KASP <sup>TM</sup> assays <sup>6</sup>                 | Br112                 |
| EN10_F3 <sup>4</sup>           | SCNL <sup>3</sup> ( <i>HMEL011986</i> )                   | HE671246 (~65983)                                             | ACCAGCTGGACATGATGAGRA       | Restriction profiles<br>( <i>HindIII</i> )             | Br112, Br117          |
| EN10_R2 <sup>4</sup>           |                                                           | HE671246 (66241)                                              | ACGRTARGCCTCAAAGTCARGAAT    |                                                        |                       |
| BAP28_F2 <sup>4</sup>          | SCNL <sup>3</sup> ( <i>HMEL002583</i> )                   | HE668177 (139034)                                             | GATCAAAAATGTATCAGTCC        | Sanger sequencing                                      | Br112                 |
| BAP28_R2 <sup>4</sup>          |                                                           | HE668177 (139761)                                             | GTTATTATCTGGAAGCTGTA        |                                                        |                       |
| <b>Around <i>HhAc/HiAc</i></b> |                                                           |                                                               |                             |                                                        |                       |
| WntAscf_gen0_F3                | Non-coding                                                | HE668478 (318250)                                             | CTGATACATTGATGAGGA          | Sanger sequencing +<br>Amplicon length<br>polymorphism | Br122, Br96,<br>Br101 |
| WntAscf_gen0_R3                |                                                           | HE668478 (319228)                                             | CTCGGAGCCACTCCTGAC          |                                                        |                       |
| WntAscf_gen0_F6                | Non-coding intergenic<br>( <i>HMEL002905-HMEL002906</i> ) | HE668478 (402431)                                             | GTCCTAGCAACTAAGTTC          | Restriction profiles ( <i>TaqI</i> )                   | Br122                 |
| WntAscf_gen0_R6a               |                                                           | HE668478 (403235)                                             | GACAKGCTTGGTCATCCA          |                                                        |                       |
| WntAscf_gen0_F6                | Non-coding intergenic<br>( <i>HMEL002905-HMEL002906</i> ) | HE668478 (402431)                                             | GTCCTAGCAACTAAGTTC          | Sanger sequencing                                      | Br96, Br101           |
| WntAscf_gen0_R6b               |                                                           | HE668478 (403501)                                             | ACTTCTTCGACGRGGTACA         |                                                        |                       |
| WntA_F <sup>5</sup>            | EPIC <sup>1</sup> ( <i>HMEL018100</i> )                   | HE668478 (481158)                                             | CAGGCGGTACGTGGTCTGT         | Sanger sequencing                                      | Br122                 |
| WntA_R <sup>5</sup>            |                                                           | HE668478 (482177)                                             | CGGCTCACAATAGTCCGGG         |                                                        |                       |
| Chitsynth3_F <sup>5</sup>      | EPIC <sup>1</sup> ( <i>HMEL018102</i> )                   | HE668478 (497654)                                             | CCTTCGACGATGGTGTAAACGTGCAAA | Sanger sequencing                                      | Br96, Br101           |
| Chitsynth3_R <sup>5</sup>      |                                                           | HE668478 (497048)                                             | AGGCACTGGGGCAAGGTGGC        |                                                        |                       |
| scf669520_gen0_F2              | EPIC <sup>1</sup> ( <i>HMEL004236</i> )                   | HE669520 (87479)                                              | AGTCTSGGTCCAGCGGA           | Amplicon length<br>polymorphism                        | Br122                 |
| scf669520_gen0_R2              |                                                           | HE669520 (88848)                                              | GGTTCTTCRACCACTCA           |                                                        |                       |

**Table S3. Continued**

| Marker name                              | Kind of marker<br>(alternative locus name)                                           | Scaffold (starting position<br>on <i>H.melpomene</i><br>reference) | Primer sequence                                    | Genotyping method<br>(enzyme)                                     | Genotyped<br>brood(s) |
|------------------------------------------|--------------------------------------------------------------------------------------|--------------------------------------------------------------------|----------------------------------------------------|-------------------------------------------------------------------|-----------------------|
| <b>Around <i>HhN/HiN</i></b>             |                                                                                      |                                                                    |                                                    |                                                                   |                       |
| Fizzyscf_genos_F5b<br>Fizzyscf_genos_R5  | EPIC <sup>1</sup> ( <i>HMELO000008</i> )                                             | HE667780 (499593)<br>HE667780 (500190)                             | GCTGCACTGCCGCCAGCTGA<br>GCTCRTCCGCTCGCATT          | Sanger sequencing                                                 | Br122                 |
| Gene25_ex7_F<br>Gene25_ex7_R             | EPIC <sup>1</sup> ( <i>HMELO000025</i> ). Partially<br>non-coding                    | HE667780 (670937)<br>HE667780 (670240)                             | TCTTCCAATTTAARCTAAYGTCTG<br>TTGCGATGTCCGCACCTGACG  | Sanger sequencing                                                 | Br96, Br101           |
| Hn25_fizz_F1<br>Gene25_ex1_R             | EPIC <sup>1</sup> ( <i>HMELO000025</i> )                                             | HE667780 (680510)<br>HE667780 (679516)                             | CGCAACGTTATCGCCTAGAT<br>GAAGCTGAAAGCGAAAGMAC       | Sanger sequencing + Restriction<br>profiles ( <i>Xho</i> I)       | Br96, Br101,<br>Br112 |
| Fizzyscf_genos_F4<br>Fizzyscf_genos_R4   | EPIC <sup>1</sup> ( <i>HMELO002028</i> ). Partially<br>non-coding                    | HE667780 (841439)<br>HE667780 (842349)                             | TGGTGGGAATACGCAAGGA<br>TGGACTGTCCGCTTAAGC          | Sanger sequencing                                                 | Br96, Br101           |
| Fizzyscf_genos_F8<br>Fizzyscf_genos_R8   | EPIC <sup>1</sup> ( <i>HMELO000041</i> )                                             | HE667780 (1030768)<br>HE667780 (1031999)                           | ACCTCAGAGTGTCCGAGCTC<br>GATGGTCCAATCAGACTGGC       | Sanger sequencing                                                 | Br96, Br101           |
| <b>Around <i>HhBr/HiBr</i></b>           |                                                                                      |                                                                    |                                                    |                                                                   |                       |
| Optixscf_genos_F5<br>Optixscf_genos_R5   | Non-coding intergenic + partial<br>exons ( <i>HMELO01009-</i><br><i>HMELO01022</i> ) | HE670865 (251935)<br>HE670865 (253169)                             | CATCCCGATCGCTAAGGCAC<br>CAACTTACASCATCAACTGAC      | Sanger sequencing                                                 | Br96, Br101           |
| Optixscf_genos_F6<br>Optixscf_genos_R6   | EPIC <sup>1</sup> ( <i>HMELO01018</i> )                                              | HE670865 (285696)<br>HE670865 (287142)                             | ATACAGGACTGGGCTCTGA<br>CCCAGCTCATTGGAAAGC          | Sanger sequencing                                                 | Br122, Br120          |
| Optixscf_genos_F14<br>Optixscf_genos_R14 | EPIC <sup>1</sup> ( <i>HMELO01014</i> )                                              | HE670865 (308062)<br>HE670865 (308886)                             | CATCTTTCAGGGAAGTATGG<br>GCACATTGCCACGGCTCG         | Restriction profiles ( <i>Taq</i> I)                              | Br96, Br101           |
| HmB453k_genos_F<br>HmB453k_genos_R       | Non-coding                                                                           | HE670865 (375602)<br>HE670865 (376487)                             | AGGTTTCYCSAGACGGTATCCTCA<br>CCGTTGGGTATCCGTAAAGCC  | Amplicon length polymorphism                                      | Br122                 |
| Optixscf_genos_F1<br>Optixscf_genos_R1   | Non-coding                                                                           | HE670865 (380464)<br>HE670865 (381718)                             | GAGACATRTTARTTTTCTCTGCC<br>CACCACCTTTGAAAGGAATCGTA | Restriction profiles ( <i>Sp</i> HI- <i>HF</i> +<br><i>Taq</i> I) | Br96, Br101,<br>Br112 |
| Optixscf_genos_F2<br>Optixscf_genos_R2   | Non-coding                                                                           | HE670865 (388302)<br>HE670865 (389396)                             | GTTCTGACTTCTGAGATCATCAT<br>AGGCATAGACAGTTGAGCGGAGA | Amplicon length polymorphism                                      | Br122                 |
| Optixscf_genos_F10<br>Optixscf_genos_R10 | EPIC <sup>1</sup> ( <i>HMELO01038</i> )                                              | HE670865 (498086)<br>HE670865 (499708)                             | ACGCCATTGAGGTAGCCTC<br>GTGGTATTGAACGATGGTC         | Sanger sequencing                                                 | Br96, Br101           |

<sup>1</sup>Exon-primed intron-crossing

<sup>2</sup>Derived Cleaved Amplified Polymorphic Sequences

<sup>3</sup>Single-copy nuclear loci

<sup>4</sup>Marcus Kronforst, *personal communication*

<sup>5</sup>Martin *et al.*, 2012

<sup>6</sup>Kompetitive Allele Specific PCR (LGC Genomics)

<sup>7</sup>Not applicable

**Table S4.** Allelic segregation of colour pattern loci in the mapping families of *H. hecale* and *H. ismenius*

| <i>Heliconius hecale melicerta</i> x <i>H. hecale clearei</i> crosses |              |                                         |                                         |                                         |                                       |                                         |            |                          |          |         |
|-----------------------------------------------------------------------|--------------|-----------------------------------------|-----------------------------------------|-----------------------------------------|---------------------------------------|-----------------------------------------|------------|--------------------------|----------|---------|
| FAMILY                                                                | COLOUR LOCUS | PATERNAL GENOTYPE                       | MATERNAL GENOTYPE                       | NUMBER OF PROGENY                       |                                       |                                         |            | EXPECTED MENDELIAN RATIO | $\chi^2$ | P-VALUE |
|                                                                       |              |                                         |                                         | <i>HhK<sub>c</sub>HhK<sub>m</sub></i>   |                                       | <i>HhK<sub>m</sub>HhK<sub>m</sub></i>   | Not scored |                          |          |         |
| Br112                                                                 | <b>HhK</b>   | <i>HhK<sub>c</sub>HhK<sub>m</sub></i>   | <i>HhK<sub>m</sub>HhK<sub>m</sub></i>   | 84                                      |                                       | 98                                      | 0          | 1:1                      | 1.0769   | 0.2994  |
| Br117                                                                 |              | <i>HhK<sub>c</sub>HhK<sub>m</sub></i>   | <i>HhK<sub>m</sub>HhK<sub>m</sub></i>   | 49                                      |                                       | 58                                      | 0          | 1:1                      | 0.7570   | 0.3843  |
| Br112+Br117                                                           |              | NA                                      | NA                                      | 133                                     |                                       | 156                                     | 0          | 1:1                      | 1.8304   | 0.1761  |
| <i>Heliconius hecale melicerta</i> x <i>H. hecale zuleika</i> crosses |              |                                         |                                         |                                         |                                       |                                         |            |                          |          |         |
| FAMILY                                                                | COLOUR LOCUS | PATERNAL GENOTYPE                       | MATERNAL GENOTYPE                       | NUMBER OF PROGENY                       |                                       |                                         |            | EXPECTED MENDELIAN RATIO | $\chi^2$ | P-VALUE |
|                                                                       |              |                                         |                                         | <i>HhAc<sub>z</sub>HhAc<sub>m</sub></i> |                                       | <i>HhAc<sub>m</sub>HhAc<sub>m</sub></i> | Not scored |                          |          |         |
| Br122                                                                 | <b>HhAc</b>  | <i>HhAc<sub>z</sub>HhAc<sub>m</sub></i> | <i>HhAc<sub>m</sub>HhAc<sub>m</sub></i> | 46                                      |                                       | 50                                      | 1          | 1:1                      | 0.1667   | 0.6831  |
| Br120                                                                 |              | <i>HhAc<sub>z</sub>HhAc<sub>m</sub></i> | <i>HhAc<sub>m</sub>HhAc<sub>m</sub></i> | 7                                       |                                       | 12                                      | 3          | 1:1                      | 1.3158   | 0.2513  |
| Br120+Br122                                                           |              | NA                                      | NA                                      | 53                                      |                                       | 62                                      | 4          | 1:1                      | 0.7043   | 0.4013  |
|                                                                       |              |                                         |                                         | <i>HhN<sub>z</sub>HhN<sub>z</sub></i>   | <i>HhN<sub>z</sub>HhN<sub>m</sub></i> | <i>HhN<sub>m</sub>HhN<sub>m</sub></i>   | Not scored |                          |          |         |
| Br122                                                                 | <b>HhN</b>   | <i>HhN<sub>z</sub>HhN<sub>m</sub></i>   | <i>HhN<sub>z</sub>HhN<sub>m</sub></i>   | 26                                      | 32                                    | 27                                      | 13         | 1:2:1                    | 3.6558   | 0.1607  |
| Br120                                                                 |              | <i>HhN<sub>z</sub>HhN<sub>m</sub></i>   | <i>HhN<sub>m</sub>HhN<sub>m</sub></i>   | NA                                      | 11                                    | 7                                       | 4          | 1:1                      | 0.8889   | 0.3458  |
| Br120+Br122                                                           |              | NA                                      | NA                                      | NA                                      | NA                                    | NA                                      | NA         | NA                       | NA       | NA      |
|                                                                       |              |                                         |                                         | <i>HhBr<sub>z</sub>HhBr<sub>m</sub></i> |                                       | <i>HhBr<sub>m</sub>HhBr<sub>m</sub></i> | Not scored |                          |          |         |
| Br122                                                                 | <b>HhBr</b>  | <i>HhBr<sub>z</sub>HhBr<sub>m</sub></i> | <i>HhBr<sub>m</sub>HhBr<sub>m</sub></i> | 49                                      |                                       | 44                                      | 5          | 1:1                      | 0.2688   | 0.6041  |
| Br120                                                                 |              | <i>HhBr<sub>z</sub>HhBr<sub>m</sub></i> | <i>HhBr<sub>m</sub>HhBr<sub>m</sub></i> | 8                                       |                                       | 11                                      | 3          | 1:1                      | 0.4737   | 0.4913  |
| Br120+Br122                                                           |              | NA                                      | NA                                      | 57                                      |                                       | 55                                      | 8          | 1:1                      | 0.0357   | 0.8501  |

Table S4. Continued

| <i>Heliconius ismenius bouletti</i> x <i>H. ismenius telchinia</i> crosses |              |                                         |                                         |                                         |                                         |            |                          |          |         |
|----------------------------------------------------------------------------|--------------|-----------------------------------------|-----------------------------------------|-----------------------------------------|-----------------------------------------|------------|--------------------------|----------|---------|
| FAMILY                                                                     | COLOUR LOCUS | PATERNAL GENOTYPE                       | MATERNAL GENOTYPE                       | NUMBER OF PROGENY                       |                                         |            | EXPECTED MENDELIAN RATIO | $\chi^2$ | P-VALUE |
|                                                                            |              |                                         |                                         | <i>HiAc<sub>t</sub>HiAc<sub>b</sub></i> | <i>HiAc<sub>b</sub>HiAc<sub>b</sub></i> | Not scored |                          |          |         |
| Br96                                                                       | <b>HiAc</b>  | <i>HiAc<sub>t</sub>HiAc<sub>b</sub></i> | <i>HiAc<sub>b</sub>HiAc<sub>b</sub></i> | 23                                      | 13                                      | 0          | 1:1                      | 2.7778   | 0.0956  |
| Br101                                                                      |              | <i>HiAc<sub>t</sub>HiAc<sub>b</sub></i> | <i>HiAc<sub>b</sub>HiAc<sub>b</sub></i> | 8                                       | 10                                      | 0          | 1:1                      | 0.2222   | 0.6374  |
| Br196+Br101                                                                |              | NA                                      | NA                                      | 31                                      | 23                                      | 0          | 1:1                      | 1.1852   | 0.2763  |
|                                                                            |              |                                         |                                         | <i>HiN<sub>t</sub>HiN<sub>b</sub></i>   | <i>HiN<sub>b</sub>HiN<sub>b</sub></i>   | Not scored |                          |          |         |
| Br96                                                                       | <b>HiN</b>   | <i>HiN<sub>t</sub>HiN<sub>b</sub></i>   | <i>HiN<sub>b</sub>HiN<sub>b</sub></i>   | 15                                      | 21                                      | 0          | 1:1                      | 1        | 0.3173  |
| Br101                                                                      |              | <i>HiN<sub>t</sub>HiN<sub>b</sub></i>   | <i>HiN<sub>b</sub>HiN<sub>b</sub></i>   | 8                                       | 10                                      | 0          | 1:1                      | 0.2222   | 0.6374  |
| Br196+Br101                                                                |              | NA                                      | NA                                      | 23                                      | 31                                      | 0          | 1:1                      | 1.1852   | 0.2763  |
|                                                                            |              |                                         |                                         | <i>HiBr<sub>t</sub>HiBr<sub>b</sub></i> | <i>HiBr<sub>b</sub>HiBr<sub>b</sub></i> | Not scored |                          |          |         |
| Br96                                                                       | <b>HiBr</b>  | <i>HiBr<sub>t</sub>HiBr<sub>b</sub></i> | <i>HiBr<sub>b</sub>HiBr<sub>b</sub></i> | 16                                      | 20                                      | 0          | 1:1                      | 0.4444   | 0.505   |
| Br101                                                                      |              | <i>HiBr<sub>t</sub>HiBr<sub>b</sub></i> | <i>HiBr<sub>b</sub>HiBr<sub>b</sub></i> | 11                                      | 7                                       | 0          | 1:1                      | 0.8889   | 0.3458  |
| Br196+Br101                                                                |              | NA                                      | NA                                      | 27                                      | 27                                      | 0          | 1:1                      | 0        | 1       |

**Table S5.** Summary of RAD library sequencing and mapping statistics.

| Filtering steps           | Library 1<br>( <i>melicerta x zuleika</i> )<br>N=64 |                             | Library 2<br>( <i>melicerta x clearei</i> )<br>N=64 |                             | Library 3<br>( <i>boulleti x telchinia</i> mainly)<br>N=64 |                             | All libraries combined<br>N=192 |                             |
|---------------------------|-----------------------------------------------------|-----------------------------|-----------------------------------------------------|-----------------------------|------------------------------------------------------------|-----------------------------|---------------------------------|-----------------------------|
|                           | Number of reads                                     | Percentage (%) <sup>1</sup> | Number of reads                                     | Percentage (%) <sup>1</sup> | Number of reads                                            | Percentage (%) <sup>1</sup> | Number of reads                 | Percentage (%) <sup>1</sup> |
| Sequenced reads           | 247,783,430                                         |                             | 162,166,578                                         |                             | 343,911,015                                                |                             | 753,861,023                     |                             |
| Retained reads            | 188,974,386                                         | 76.27                       | 137,315,022                                         | 84.68                       | 290,156,532                                                | 84.37                       | 616,445,940                     | <b>81.77</b>                |
| Mapped reads              | 177,609,643                                         | 93.99                       | 129,572,241                                         | 94.36                       | 272,334,861                                                | 93.86                       | 579,516,745                     | <b>94.01</b>                |
| Reads after deduplication | 23,454,960                                          | 13.21                       | 16,954,588                                          | 13.09                       | 26,418,741                                                 | 9.70                        | 66,828,289                      | <b>11.53</b>                |
|                           |                                                     | 9.47 <sup>2</sup>           |                                                     | 10.46 <sup>2</sup>          |                                                            | 7.68 <sup>2</sup>           |                                 | <b>8.86<sup>2</sup></b>     |

<sup>1</sup>Percentage is expressed relative to the number of reads in the previous filtering step

<sup>2</sup>Percentage of reads after deduplication relative to the total number of sequenced reads

**Table S6.** Number of per-individual 100-bp Illumina reads (sequenced and filtered through the first quality filtering steps) in Library 1 (Brood 122: *H. hecale melicerta* x *H. h. zuleika*)

| Barcode      | Sample                       | Sequenced reads   | Retained reads    | Mapped reads      | Reads after deduplication |
|--------------|------------------------------|-------------------|-------------------|-------------------|---------------------------|
| <b>CGATA</b> | <b>MJ11-2718<sup>1</sup></b> | <b>25 732 118</b> | <b>18 438 392</b> | <b>16 778 275</b> | <b>1 045 850</b>          |
| ACACG        | MJ11-2688                    | 9 948 346         | 7 205 156         | 6 791 939         | 949 641                   |
| CCAAC        | MJ11-2779                    | 9 939 526         | 7 779 076         | 7 337 787         | 912 266                   |
| ATATC        | MJ11-2731                    | 10 319 068        | 7 483 572         | 7 059 846         | 907 840                   |
| AGGAC        | MJ11-2730                    | 9 181 841         | 7 292 064         | 6 918 616         | 892 152                   |
| ATGCT        | MJ11-2776                    | 9 207 657         | 7 267 068         | 6 886 915         | 877 760                   |
| <b>CGGCG</b> | <b>MJ11-2463<sup>2</sup></b> | <b>8 396 067</b>  | <b>6 994 052</b>  | <b>6 626 957</b>  | <b>854 830</b>            |
| AGAGT        | MJ11-2729                    | 8 855 104         | 6 591 020         | 6 252 333         | 847 735                   |
| CCGGT        | MJ11-2780                    | 8 858 882         | 7 125 696         | 6 548 152         | 844 874                   |
| CAGTC        | MJ11-2778                    | 8 446 873         | 6 659 330         | 6 284 163         | 838 981                   |
| CAACT        | MJ11-2777                    | 8 374 724         | 6 177 230         | 5 830 719         | 806 271                   |
| TTGGC        | MJ11-2642                    | 6 671 879         | 5 386 058         | 5 026 425         | 739 315                   |
| AAAAA        | MJ11-2685                    | 6 210 214         | 4 324 324         | 4 105 322         | 667 760                   |
| GCATT        | MJ11-2612                    | 5 442 139         | 4 441 378         | 4 223 045         | 579 166                   |
| GGAAG        | MJ11-2614                    | 5 164 532         | 4 049 114         | 3 848 970         | 554 353                   |
| AAGGG        | MJ11-2686                    | 5 479 533         | 2 903 670         | 2 743 489         | 509 770                   |
| GCGCC        | MJ11-2613                    | 4 379 898         | 3 631 954         | 3 449 297         | 499 812                   |
| GGGGA        | MJ11-2616                    | 4 541 978         | 3 617 850         | 3 440 234         | 499 135                   |
| TAGCA        | MJ11-2630                    | 4 546 801         | 3 690 104         | 3 502 306         | 490 533                   |
| TGGTT        | MJ11-2640                    | 4 284 587         | 3 425 896         | 3 259 201         | 475 009                   |
| GAAGC        | MJ11-2591                    | 4 057 737         | 3 302 644         | 3 137 934         | 465 573                   |
| ACGTA        | MJ11-2728                    | 3 997 431         | 2 602 282         | 2 435 934         | 451 995                   |
| TAATG        | MJ11-2627                    | 4 060 992         | 3 208 364         | 3 053 018         | 443 538                   |
| GTGTG        | MJ11-2626                    | 3 929 706         | 3 096 300         | 2 943 795         | 431 993                   |
| CTAGG        | MJ11-2580                    | 3 577 563         | 2 814 156         | 2 672 368         | 403 496                   |
| GAGAT        | MJ11-2596                    | 3 298 722         | 2 410 394         | 2 223 612         | 338 276                   |
| CATGA        | MJ11-2813                    | 4 861 128         | 3 930 732         | 3 617 383         | 337 509                   |
| TCTCT        | MJ11-2963                    | 4 956 151         | 3 547 176         | 3 260 669         | 321 423                   |
| GTCAC        | MJ11-2786                    | 1 928 458         | 1 584 916         | 1 495 332         | 316 396                   |
| GGTTC        | MJ11-2787                    | 1 662 645         | 1 375 690         | 1 298 944         | 283 395                   |
| TATAC        | MJ11-2965                    | 2 193 856         | 1 730 656         | 1 639 341         | 275 326                   |
| TCAGA        | MJ11-2637                    | 2 322 884         | 1 788 856         | 1 698 940         | 272 777                   |
| TGCAA        | MJ11-2848                    | 3 302 057         | 2 779 298         | 2 618 276         | 267 625                   |
| TTTTA        | MJ11-2845                    | 3 255 758         | 2 436 620         | 2 304 275         | 254 513                   |
| TTAAT        | MJ11-2641                    | 2 067 017         | 1 602 960         | 1 516 407         | 247 341                   |
| TGTGG        | MJ11-2847                    | 3 202 932         | 2 453 990         | 2 304 730         | 244 115                   |
| GGCCT        | MJ11-2788                    | 1 343 268         | 1 065 984         | 1 009 162         | 234 640                   |
| TACGT        | MJ11-2966                    | 1 901 846         | 1 532 234         | 1 451 874         | 232 105                   |
| TCCTC        | MJ11-2964                    | 1 598 237         | 1 272 922         | 1 205 446         | 210 738                   |
| CACAG        | MJ11-2844                    | 2 758 648         | 1 958 736         | 1 844 666         | 207 073                   |
| CCCCA        | MJ11-2812                    | 2 199 867         | 1 804 264         | 1 702 524         | 202 929                   |
| TTCCG        | MJ11-2846                    | 2 298 902         | 1 863 760         | 1 756 883         | 197 950                   |

**Table S6. Continued**

| <b>Barcode</b> | <b>Sample</b> | <b>Sequenced reads</b> | <b>Retained reads</b> | <b>Mapped reads</b> | <b>Reads after deduplication</b> |
|----------------|---------------|------------------------|-----------------------|---------------------|----------------------------------|
| TGACC          | MJ11-2639     | 1 479 142              | 1 158 840             | 1 101 095           | 192 258                          |
| CTGAA          | MJ11-2581     | 1 484 154              | 1 143 548             | 1 086 926           | 183 045                          |
| GTACA          | MJ11-2625     | 1 470 511              | 1 078 542             | 1 023 942           | 174 039                          |
| CGCGC          | MJ11-2810     | 1 402 412              | 1 212 288             | 1 132 074           | 140 201                          |
| CGTAT          | MJ11-2809     | 1 925 999              | 1 229 322             | 1 165 702           | 138 446                          |
| CTCTT          | MJ11-2808     | 1 469 152              | 1 129 968             | 1 072 183           | 135 665                          |
| TCGAG          | MJ11-2638     | 1 066 706              | 692 680               | 658 963             | 114 911                          |
| GTTGT          | MJ11-2785     | 604 765                | 449 850               | 427 501             | 108 821                          |
| GACTA          | MJ11-2804     | 1 044 231              | 892 068               | 848 964             | 107 587                          |
| ATCGA          | MJ11-2784     | 564 604                | 432 496               | 408 847             | 105 636                          |
| CTTCC          | MJ11-2807     | 1 015 487              | 785 930               | 744 019             | 94 790                           |
| GATCG          | MJ11-2791     | 1 122 903              | 837 066               | 725 156             | 92 291                           |
| AGCTG          | MJ11-2806     | 873 478                | 712 370               | 670 957             | 88 462                           |
| GCTAA          | MJ11-2789     | 854 270                | 708 964               | 671 480             | 84 591                           |
| CCTTG          | MJ11-2811     | 922 259                | 668 524               | 633 733             | 82 567                           |
| AGTCA          | MJ11-2805     | 703 939                | 563 242               | 533 604             | 70 742                           |
| GCCGG          | MJ11-2790     | 548 449                | 461 576               | 436 666             | 59 917                           |
| ATTAG          | MJ11-2782     | 350 203                | 165 148               | 156 696             | 44 637                           |
| ACTGC          | MJ11-2657     | 20 076                 | 1 760                 | 1 655               | 798                              |
| AATTT          | MJ11-2653     | 49 739                 | 1 630                 | 1 489               | 683                              |
| AACCC          | MJ11-2651     | 9 263                  | 1 276                 | 1 198               | 549                              |
| ACCAT          | MJ11-2656     | 44 116                 | 1 360                 | 1 289               | 544                              |
| <b>Total</b>   |               | <b>247 783 430</b>     | <b>188 974 386</b>    | <b>177 609 643</b>  | <b>23 454 960</b>                |

<sup>1</sup>Mother of brood 122

<sup>2</sup>Father of brood 122



**Table S7.** Number of per-individual 100-bp Illumina reads (sequenced and filtered through the first quality filtering steps) in Library 2 (Brood 112: *H. hecale melicerta* x *H. h. clearei*)

| Barcode | Sample                 | Sequenced reads | Retained reads | Mapped reads | Reads after deduplication |
|---------|------------------------|-----------------|----------------|--------------|---------------------------|
| CGATA   | MJ11-2706 <sup>1</sup> | 31 586 600      | 26 752 988     | 24 751 360   | 1 753 361                 |
| CGGCG   | MJ11-2296 <sup>2</sup> | 8 892 296       | 7 738 266      | 7 313 679    | 1 085 291                 |
| CAGTC   | MJ11-2711              | 5 281 174       | 1 560 946      | 1 485 986    | 479 463                   |
| GAAGC   | MJ11-2430              | 3 056 550       | 2 112 546      | 2 007 728    | 478 822                   |
| AAGGG   | MJ11-2670              | 5 328 565       | 2 630 936      | 2 513 321    | 469 090                   |
| AGAGT   | MJ11-2690              | 5 307 831       | 2 461 396      | 2 348 132    | 460 205                   |
| ACACG   | MJ11-2672              | 4 686 169       | 2 370 502      | 2 269 696    | 451 060                   |
| GAGAT   | MJ11-2432              | 3 054 033       | 2 265 006      | 2 159 296    | 440 877                   |
| TCGAG   | MJ11-2543              | 2 905 596       | 2 304 474      | 2 192 958    | 439 031                   |
| TAGCA   | MJ11-2522              | 2 867 345       | 2 064 096      | 1 967 730    | 438 357                   |
| GCATT   | MJ11-2433              | 2 818 020       | 1 608 594      | 1 530 684    | 424 645                   |
| GCGCC   | MJ11-2467              | 2 610 108       | 1 988 918      | 1 893 799    | 419 014                   |
| TAATG   | MJ11-2521              | 2 687 770       | 2 198 134      | 2 093 376    | 414 354                   |
| ATATC   | MJ11-2693              | 4 653 598       | 2 377 810      | 2 270 310    | 414 315                   |
| GGAAG   | MJ11-2483              | 2 845 371       | 2 108 804      | 2 000 793    | 413 891                   |
| CCGGT   | MJ11-2715              | 4 349 906       | 2 407 456      | 2 292 018    | 405 284                   |
| TCAGA   | MJ11-2539              | 2 481 961       | 697 724        | 663 884      | 395 128                   |
| ACGTA   | MJ11-2678              | 4 390 208       | 898 550        | 843 157      | 394 874                   |
| CAACT   | MJ11-2708              | 4 215 097       | 984 888        | 936 834      | 393 694                   |
| CTGAA   | MJ11-2428              | 2 517 675       | 1 772 692      | 1 681 187    | 393 525                   |
| AGGAC   | MJ11-2691              | 4 221 221       | 4 684          | 4 396        | 392 870                   |
| GGGGA   | MJ11-2486              | 2 466 810       | 4 558          | 4 030        | 391 989                   |
| ATGCT   | MJ11-2695              | 4 271 691       | 3 956          | 3 478        | 391 671                   |
| CCAAC   | MJ11-2714              | 4 335 602       | 3 076          | 2 781        | 383 291                   |
| GTGTG   | MJ11-2492              | 2 444 909       | 3 518 438      | 3 237 167    | 370 833                   |
| AAAAA   | MJ11-2648              | 4 053 702       | 4 388 290      | 4 182 964    | 369 351                   |
| TTGGC   | MJ11-2593              | 2 102 579       | 4 031 774      | 3 846 639    | 343 279                   |
| GTACA   | MJ11-2491              | 2 004 021       | 3 780 838      | 3 582 411    | 314 747                   |
| CTAGG   | MJ11-2403              | 1 919 328       | 4 471 800      | 4 268 083    | 308 116                   |
| TGCAA   | MJ11-2874              | 2 101 028       | 3 562 670      | 3 370 565    | 208 582                   |
| TTAAT   | MJ11-2592              | 1 179 074       | 3 863 334      | 3 662 897    | 199 176                   |
| TCTCT   | MJ11-2882              | 1 925 304       | 3 602 622      | 3 422 215    | 198 716                   |
| TGGTT   | MJ11-2578              | 1 175 456       | 3 630 180      | 3 433 194    | 182 746                   |
| TATAC   | MJ11-2886              | 1 788 779       | 4 538 612      | 4 304 519    | 181 636                   |
| TCCTC   | MJ11-2883              | 1 668 337       | 3 661 136      | 3 462 336    | 172 084                   |
| TTTTA   | MJ11-2840              | 1 575 227       | 3 774 034      | 3 508 621    | 161 672                   |
| TGTGG   | MJ11-2872              | 1 528 011       | 106 116        | 100 190      | 155 147                   |
| TACGT   | MJ11-2889              | 1 482 460       | 222 490        | 206 870      | 152 859                   |
| TGACC   | MJ11-2577              | 901 106         | 98 452         | 93 130       | 149 028                   |
| CCCCA   | MJ11-2830              | 1 231 483       | 850 112        | 802 002      | 135 213                   |
| CATGA   | MJ11-2835              | 1 213 001       | 742 494        | 709 037      | 126 761                   |
| TTCCG   | MJ11-2871              | 1 085 307       | 625 206        | 597 542      | 113 251                   |

**Table S7. Continued**

| <b>Barcode</b> | <b>Sample</b> | <b>Sequenced reads</b> | <b>Retained reads</b> | <b>Mapped reads</b> | <b>Reads after deduplication</b> |
|----------------|---------------|------------------------|-----------------------|---------------------|----------------------------------|
| GTCAC          | MJ11-2753     | 968 012                | 625 700               | 597 286             | 108 186                          |
| GGTTC          | MJ11-2754     | 849 310                | 188 108               | 142 238             | 95 484                           |
| GGCCT          | MJ11-2755     | 729 743                | 277 804               | 264 490             | 80 997                           |
| GACTA          | MJ11-2769     | 724 078                | 638 648               | 610 420             | 79 232                           |
| GCTAA          | MJ11-2759     | 708 833                | 277 024               | 262 923             | 78 435                           |
| CGTAT          | MJ11-2799     | 748 972                | 496 068               | 472 509             | 77 493                           |
| CGCGC          | MJ11-2815     | 571 647                | 369 196               | 352 124             | 65 859                           |
| AGCTG          | MJ11-2793     | 576 094                | 430 126               | 410 663             | 64 824                           |
| CTCTT          | MJ11-2797     | 514 797                | 593 006               | 565 555             | 56 653                           |
| CTTCC          | MJ11-2795     | 431 437                | 500 100               | 476 158             | 47 334                           |
| CCTTG          | MJ11-2816     | 377 567                | 315 946               | 300 598             | 40 945                           |
| GATCG          | MJ11-2763     | 328 597                | 1 057 588             | 1 008 614           | 37 489                           |
| AGTCA          | MJ11-2770     | 323 388                | 1 060 754             | 978 067             | 37 018                           |
| CACAG          | MJ11-2839     | 282 425                | 238 696               | 222 314             | 31 191                           |
| ATCGA          | MJ11-2748     | 259 617                | 1 358 780             | 1 296 008           | 29 519                           |
| GCCGG          | MJ11-2762     | 216 249                | 937 192               | 890 200             | 25 964                           |
| ATTAG          | MJ11-2747     | 134 276                | 1 333 234             | 1 237 185           | 14 746                           |
| GTTGT          | MJ11-2750     | 132 182                | 1 856 788             | 1 768 236           | 13 690                           |
| AATTT          | MJ11-2609     | 29 376                 | 1 661 118             | 1 587 855           | 649                              |
| AACCC          | MJ11-2608     | 8 429                  | 1 458 554             | 1 391 294           | 644                              |
| ACCAT          | MJ11-2633     | 28 437                 | 1 562 614             | 1 493 977           | 536                              |
| ACTGC          | MJ11-2636     | 12 803                 | 1 288 380             | 1 222 532           | 399                              |
| <b>Total</b>   |               | <b>162 166 578</b>     | <b>137 315 022</b>    | <b>129 572 241</b>  | <b>16 954 588</b>                |

<sup>1</sup>Mother of brood 112

<sup>2</sup>Father of brood 112

**Table S8.** Number of per-individual 100-bp Illumina reads (sequenced and filtered through the first quality filtering steps) in Library 3 (Broods 96 and 101 mainly: *H. ismenius bouletti* x *H. h. telchinia*)

| Barcode | Sample                 | Sequenced reads | Retained reads | Mapped reads | Reads after deduplication |
|---------|------------------------|-----------------|----------------|--------------|---------------------------|
| CTAGG   | MJ11-2264 <sup>1</sup> | 38 739 993      | 32 662 854     | 30 342 291   | 1 892 527                 |
| CGATA   | MJ11-2363 <sup>2</sup> | 35 389 452      | 30 194 930     | 28 576 405   | 1 805 661                 |
| CGGCG   | MJ11-2406 <sup>3</sup> | 20 585 884      | 17 325 512     | 15 399 581   | 1 383 246                 |
| CAACT   | MJ11-2402              | 11 850 348      | 10 062 816     | 9 479 636    | 1 142 718                 |
| AAGGG   | MJ11-2329              | 8 458 331       | 6 960 246      | 6 539 455    | 918 845                   |
| GCATT   | MJ11-2301              | 12 787 618      | 10 934 104     | 10 339 925   | 816 704                   |
| AAAAA   | MJ11-2328              | 7 597 081       | 6 342 870      | 5 984 500    | 812 860                   |
| TGGTT   | MJ11-2318              | 12 740 143      | 10 897 012     | 10 283 756   | 799 158                   |
| GAAGC   | MJ11-2290              | 12 163 923      | 10 553 168     | 9 936 356    | 745 201                   |
| ATATC   | MJ11-2368              | 7 975 510       | 6 518 902      | 6 197 532    | 742 741                   |
| ACACG   | MJ11-2364              | 5 624 189       | 4 709 820      | 4 491 874    | 717 336                   |
| CAGTC   | MJ11-2408              | 5 959 139       | 5 034 456      | 4 712 162    | 701 873                   |
| CCAAC   | MJ11-2426              | 5 881 182       | 4 974 108      | 4 687 226    | 684 329                   |
| ATGCT   | MJ11-2369              | 5 788 804       | 4 842 640      | 4 621 616    | 677 135                   |
| GGGGA   | MJ11-2304              | 9 563 462       | 8 086 646      | 7 622 086    | 661 028                   |
| TAGCA   | MJ11-2313              | 8 668 218       | 7 495 530      | 6 988 366    | 589 846                   |
| GGAAG   | MJ11-2303              | 8 074 931       | 6 585 794      | 6 268 711    | 561 974                   |
| TGACC   | MJ11-2317              | 6 893 188       | 5 865 872      | 5 462 717    | 529 000                   |
| TCAGA   | MJ11-2315              | 7 144 977       | 6 181 174      | 5 884 549    | 516 684                   |
| GAGAT   | MJ11-2300              | 7 201 087       | 5 766 030      | 5 457 954    | 513 365                   |
| GCGCC   | MJ11-2302              | 6 894 298       | 5 970 946      | 5 685 755    | 513 153                   |
| CCGGT   | MJ11-2427              | 3 846 722       | 3 211 670      | 3 031 477    | 501 911                   |
| GTACA   | MJ11-2305              | 6 605 964       | 5 678 316      | 5 281 624    | 499 396                   |
| CTGAA   | MJ11-2314              | 6 084 170       | 5 239 820      | 4 933 966    | 462 258                   |
| TAATG   | MJ11-2312              | 6 127 570       | 5 031 616      | 4 750 616    | 438 485                   |
| TCGAG   | MJ11-2316              | 5 605 360       | 4 749 388      | 4 471 598    | 431 093                   |
| GTGTG   | MJ11-2306              | 5 673 645       | 4 796 346      | 4 477 293    | 427 402                   |
| AGAGT   | MJ11-2366              | 3 326 990       | 2 630 738      | 2 516 304    | 418 175                   |
| TGCAA   | MJ11-2687*             | 4 703 459       | 4 046 032      | 3 857 234    | 352 986                   |
| ACGTA   | MJ11-2365              | 2 490 780       | 2 082 294      | 1 977 996    | 349 413                   |
| TCCTC   | MJ11-2652*             | 4 034 566       | 3 480 000      | 3 307 773    | 318 913                   |
| TCTCT   | MJ11-2849*             | 4 335 342       | 3 622 550      | 3 446 747    | 318 703                   |
| TGTGG   | MJ11-2655*             | 4 237 022       | 3 618 720      | 3 449 153    | 317 078                   |
| TTGGC   | MJ11-2320              | 3 534 799       | 3 039 474      | 2 833 474    | 314 358                   |
| TTCCG   | MJ11-2617*             | 3 788 221       | 3 211 864      | 3 006 985    | 284 027                   |
| TATAC   | MJ11-2781*             | 3 682 044       | 3 118 546      | 2 975 126    | 278 910                   |
| AGGAC   | MJ11-2367              | 2 103 408       | 1 772 862      | 1 663 580    | 268 682                   |
| TTAAT   | MJ11-2319              | 2 855 219       | 2 265 572      | 2 149 925    | 253 072                   |
| TTTTA   | MJ11-2998              | 3 256 291       | 2 651 558      | 2 504 958    | 225 434                   |
| GGTTC   | MJ11-2379              | 1 218 766       | 1 012 952      | 954 444      | 186 409                   |
| TACGT   | MJ11-2771**            | 2 248 345       | 1 858 028      | 1 775 254    | 176 892                   |
| CATGA   | MJ11-2574              | 2 113 463       | 1 809 542      | 1 670 742    | 163 741                   |

**Table S8. Continued**

| <b>Barcode</b> | <b>Sample</b> | <b>Sequenced reads</b> | <b>Retained reads</b> | <b>Mapped reads</b> | <b>Reads after deduplication</b> |
|----------------|---------------|------------------------|-----------------------|---------------------|----------------------------------|
| CCCCA          | MJ11-2538     | 1 707 097              | 1 472 432             | 1 387 340           | 160 200                          |
| GTCAC          | MJ11-2355     | 942 327                | 794 328               | 742 446             | 150 804                          |
| CACAG          | MJ11-2575     | 1 716 787              | 1 463 884             | 1 374 591           | 141 343                          |
| GGCCT          | MJ11-2380     | 784 393                | 637 040               | 599 575             | 126 435                          |
| GCTAA          | MJ11-2495     | 768 449                | 641 738               | 600 169             | 123 719                          |
| AGTCA          | MJ11-2531     | 1 414 800              | 1 218 734             | 1 149 939           | 115 585                          |
| GTTGT          | MJ11-2999     | 731 729                | 586 036               | 473 402             | 100 733                          |
| CGTAT          | MJ11-2535     | 1 261 035              | 1 020 876             | 961 773             | 100 591                          |
| CTCTT          | MJ11-2534     | 1 255 996              | 1 029 298             | 910 773             | 97 738                           |
| CCTTG          | MJ11-2537     | 1 123 829              | 934 320               | 878 531             | 90 555                           |
| ATCGA          | MJ11-2514     | 594 343                | 465 982               | 434 760             | 81 186                           |
| CGCGC          | MJ11-2536     | 857 887                | 728 766               | 683 611             | 80 286                           |
| CTTCC          | MJ11-2533     | 983 648                | 822 396               | 775 596             | 80 273                           |
| GATCG          | MJ11-2525     | 449 316                | 374 746               | 352 131             | 77 861                           |
| GACTA          | MJ11-2530     | 403 094                | 334 220               | 318 600             | 68 845                           |
| AGCTG          | MJ11-2532     | 573 222                | 452 954               | 425 768             | 48 395                           |
| GCCGG          | MJ11-2496     | 220 997                | 183 268               | 171 040             | 40 981                           |
| ATTAG          | MJ11-2443     | 136 823                | 93 956                | 88 736              | 19 320                           |
| ACTGC          | MJ11-2327     | 21 869                 | 5 498                 | 5 004               | 763                              |
| AACCC          | MJ11-2324     | 8 616                  | 696                   | 681                 | 162                              |
| AATTT          | MJ11-2325     | 54 797                 | 574                   | 541                 | 125                              |
| ACCAT          | MJ11-2326     | 46 057                 | 1 472                 | 1 132               | 121                              |
| <b>Total</b>   |               | <b>343 911 015</b>     | <b>290 156 532</b>    | <b>272 334 861</b>  | <b>26 418 742</b>                |

<sup>1</sup>Father of broods 96 and 101

<sup>2</sup>Mother of brood 96

<sup>3</sup>Mother of brood 101

\*Individuals belonging to brood 122

\*\*Individual belonging to brood 112

**Table S9.** Summary of RAD library marker types and segregation patterns

| Cross                            | Genotyped sites<br>(variable and not) <sup>1</sup> | Female<br>informative<br>markers <sup>2</sup> | Male<br>informative<br>markers <sup>3</sup> | Intercross<br>markers <sup>4</sup> | Total<br>informative<br>sites | Segregation patterns <sup>5</sup> |                              |                                | Total | Markers<br>in<br>maps <sup>6</sup> |
|----------------------------------|----------------------------------------------------|-----------------------------------------------|---------------------------------------------|------------------------------------|-------------------------------|-----------------------------------|------------------------------|--------------------------------|-------|------------------------------------|
|                                  |                                                    |                                               |                                             |                                    |                               | Supported<br>by 1<br>marker       | Supported<br>by 2<br>markers | Supported<br>by >=3<br>markers |       |                                    |
| <i>melicerta x zuleika</i>       | 187,559                                            | 1,066                                         | 1,106                                       | 484                                | 2,656                         | 346                               | 123                          | 182                            | 651   | 526                                |
| <i>melicerta x clearei</i>       | 142,662                                            | 1,085                                         | 749                                         | 310                                | 2,144                         | 342                               | 124                          | 162                            | 628   | 546                                |
| <i>boulleti x telchinia</i>      | 290,275                                            | 738                                           | 715                                         | 307                                | 1,760                         | 512                               | 113                          | 69                             | 694   | 270                                |
| <b>All broods combined</b>       | 620,496                                            | 2,889                                         | 2,570                                       | 1,101                              | 6,560                         | 1,200                             | 360                          | 413                            | 1,973 | 1,342                              |
| <b>Average across<br/>broods</b> | 206,832                                            | 963                                           | 857                                         | 367                                | 2,187                         | 400                               | 120                          | 138                            | 658   | 447                                |

<sup>1</sup>Markers for which SNPs were called in >=80% offspring (>10X and <200X/249X for offspring/parents respectively, GQ >=30, MQ>= 40), missing data was imputed in Beagle and Mendelian inconsistencies were excluded

<sup>2</sup>Markers heterozygous in mother and homozygous in father, excluding those not fitting a 1:1 ratio

<sup>3</sup>Markers heterozygous in father and homozygous in mother, excluding those not fitting a 1:1 ratio

<sup>4</sup>Markers heterozygous in both parents, excluding those not fitting 1:2:1 ratio

<sup>6</sup>Markers mapped to the 20 autosomes within *Joinmap* (Van Oijen and Voorrips, 2001)

**Table S10.** Summary of major and minor (suggestive) QTLs mapped in *H. hecale* and *H. ismenius*

| Chromosome | Name <sup>A</sup> | Homologous colour locus <sup>B</sup>                                           | Candidate gene | Phenotypic effect <sup>C</sup>                                                                      | Cross                                                | Scaffold(s) <sup>D</sup> |
|------------|-------------------|--------------------------------------------------------------------------------|----------------|-----------------------------------------------------------------------------------------------------|------------------------------------------------------|--------------------------|
| 1          | –                 |                                                                                |                | Variation of the FW yellow apical dots and the marginal edge of the FW band                         | <i>H. hecale melicerta</i> x <i>H. h. clearei</i>    | HE672073-HE672064        |
| 7          | –                 |                                                                                |                | Position of the proximal edge of the HW black marginal band                                         | <i>H. hecale melicerta</i> x <i>H. h. zuleika</i>    | HE671567                 |
| 10         | –                 |                                                                                |                | Black/orange switch near the HW costa and shape of the distal edge of the FW band                   | <i>H. hecale melicerta</i> x <i>H. h. clearei</i>    | HE671252-HE668478        |
| 10         | <i>HhAc</i>       | <i>Ac (H. melpomene),<br/>Sd (H. erato/himera),<br/>Ac (H. cydno/pachinus)</i> | <i>WntA</i>    | <b>Size and position of black patterns close to the FW discal cell</b>                              | <i>H. hecale melicerta</i> x <i>H. h. zuleika</i>    | <b>HE668478 (378)</b>    |
| 10         | <i>HiAc</i>       | <i>Ac (H. melpomene),<br/>Sd (H. erato/himera),<br/>Ac (H. cydno/pachinus)</i> | <i>WntA?</i>   | <b>Size and position of black patterns close to the FW discal cell</b>                              | <i>H. ismenius bouletti</i> x <i>H. i. telchinia</i> | <b>HE668478 (519)</b>    |
| 12         | –                 |                                                                                |                | Black/orange switch on median region of HW                                                          | <i>H. hecale melicerta</i> x <i>H. h. clearei</i>    | HE672051                 |
| 13         | –                 |                                                                                |                | HW and proximal FW melanisation, and shape of the proximal edge of the FW band                      | <i>H. hecale melicerta</i> x <i>H. h. clearei</i>    | HE670176*-HE671149       |
| 13         | –                 |                                                                                |                | Shape of the proximal edge of the HW black marginal band and variation of the FW yellow apical dots | <i>H. hecale melicerta</i> x <i>H. h. zuleika</i>    | HE671149-HE670666        |

Table S10. Continued

| Chromosome | Name <sup>A</sup> | Homologous colour locus <sup>B</sup>                                        | Candidate gene | Phenotypic effect <sup>C</sup>                                                                                                                  | Cross                                                | Scaffold(s) <sup>D</sup> |
|------------|-------------------|-----------------------------------------------------------------------------|----------------|-------------------------------------------------------------------------------------------------------------------------------------------------|------------------------------------------------------|--------------------------|
| 15         | Fspot;<br>HhN     | Fspot=?; HhN=N?<br>( <i>H. melpomene</i> )                                  |                | Variation of the FW yellow apical dots (Fspot), shape of the distal edge of the FW band (HhN) and melanisation of the HW and proximal FW region | <i>H. hecale melicerta</i> x <i>H. h. clearei</i>    | HE667780 (623)           |
| 15         | –                 |                                                                             |                | Melanisation of the HW and the proximal FW region                                                                                               | <i>H. hecale melicerta</i> x <i>H. h. clearei</i>    | HE671193                 |
| 15         | Hspot;<br>HhN     | Hspot=Sb<br>( <i>H. melpomene/cydno</i> );<br>HhN=N ( <i>H. melpomene</i> ) |                | Variation in the number of yellow spots on the margin of the HW (Hspot) and the presence/absence of the third row of yellow FW spots (HhN)      | <i>H. hecale melicerta</i> x <i>H. h. zuleika</i>    | HE667780 (295)           |
| 15         | HiN               | N ( <i>H. melpomene</i> )                                                   |                | Variation in the distal area of the FW band (HiN) and melanisation on the HW median and distal area                                             | <i>H. ismenius bouletti</i> x <i>H. i. telchinia</i> | HE667780                 |
| 16         | –                 |                                                                             |                | Black/orange switch near the HW costa and shape of the distal edge of the FW band                                                               | <i>H. hecale melicerta</i> x <i>H. h. clearei</i>    | HE668274                 |
| 17         | –                 |                                                                             |                | Shape of the distal edge of the FW band                                                                                                         | <i>H. ismenius bouletti</i> x <i>H. i. telchinia</i> | HE671784-HE671089        |
| 18         | Cm                | B, D ( <i>H. melpomene</i> ),<br>D ( <i>H. erato</i> )                      | optix?         | Black/orange switch on the HW and the proximal FW region                                                                                        | <i>H. hecale melicerta</i> x <i>H. h. clearei</i>    | HE670865 (629)           |
| 18         | HhBr              | Br ( <i>H. cydno/pachinus</i> )                                             | optix?         | Shape of the black marginal band of the HW                                                                                                      | <i>H. hecale melicerta</i> x <i>H. h. zuleika</i>    | HE670865 (652)           |
| 18         | HiBr              | Br ( <i>H. cydno/pachinus</i> )                                             | optix?         | Shape of the black marginal band of the HW                                                                                                      | <i>H. ismenius bouletti</i> x <i>H. i. telchinia</i> | HE670865 (293)           |

<sup>A</sup> Dashes correspond to unnamed QTLs. Traits segregating in Mendelian ratios are in italic script. Traits written in non-italics refer simultaneously to the quantitative trait and the QTL of major effect associated with it. Major effect loci are written in bold, minor QTLs are written in non-bold. Minor effect loci usually correspond to suggestive QTLs detected using a lower threshold ( $LOD \geq 3$ ) and might act as modifiers of pattern elements also controlled by major loci.

<sup>B</sup> One of the names given to Mendelian colour loci being homologous to the QTLs in *H. hecale* and *H. ismenius* in other *Heliconius* species (shown in brackets and separated by a slash when their detection involved interspecific crosses). The equality symbol represents homology in cases where more than one pattern element is associated with the same QTL. Detailed information about the colour loci mapped in other species can be found in Table S1.

<sup>C</sup> Heatmaps describing the phenotypic effect of each QTL are shown in Figures 3 and S8. FW stands for forewing(s) and HW for hindwing(s).

<sup>D</sup> Most likely location of a given QTL on a genomic scaffold or between a pair of scaffolds (separated by a hyphen). For major effect loci, segregation patterns corresponding to those in Figure S7 are shown in brackets.

\* Unmapped scaffold.



## SUPPLEMENTARY FIGURES

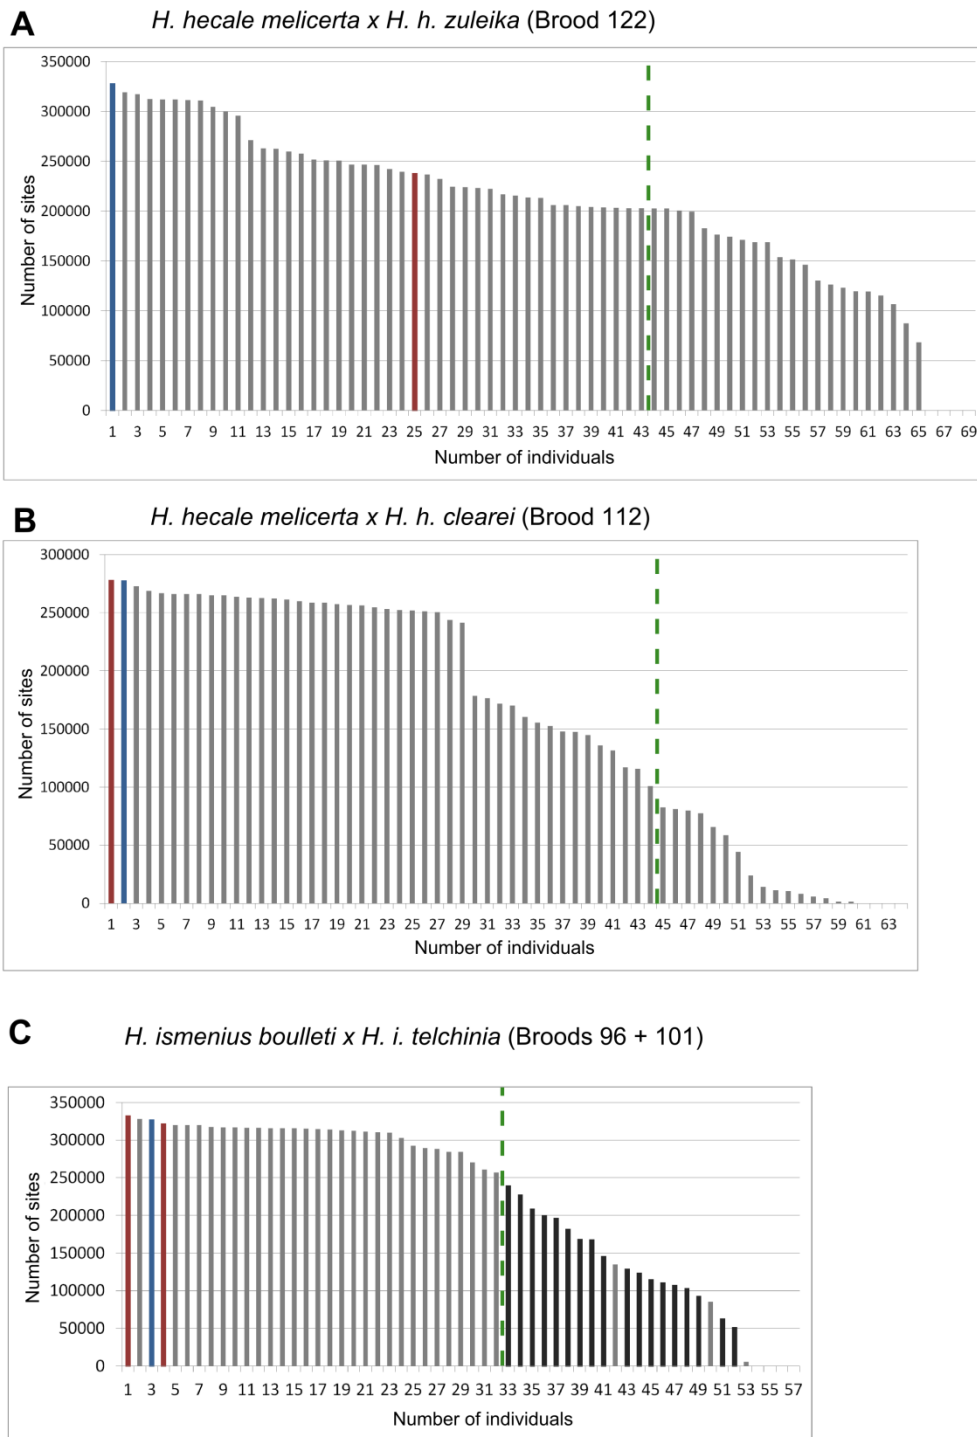

**Figure S1.** Number of retained positions after filtering genotype calls for coverage (>10x and <200x/249x for offspring/parents, respectively), genotype quality (GQ ≥30) and mapping quality (MQ ≥ 40) with a custom *Perl* script (Kanchon Dasmahapatra 2012, personal communication). **(A)** *H. hecale melicerta* x *H. h. zuleika*, **(B)** *H. hecale melicerta* x *H. h. clearei* and **(C)** *H. ismenius bouletti* x *H. i. telchinia* broods (grey and black bars denote brood 96 and 101, respectively). In all panels, blue bars indicate the F1 father and red bars the mother(s). Only individuals left of the vertical dashed green line were retained for mapping (41, 42 and 29 offspring plus 2 backcross parents in Broods 122, 112 and 96, respectively). Due to low sequence volumes in all Brood 101 progeny, this brood was excluded from the mapping.

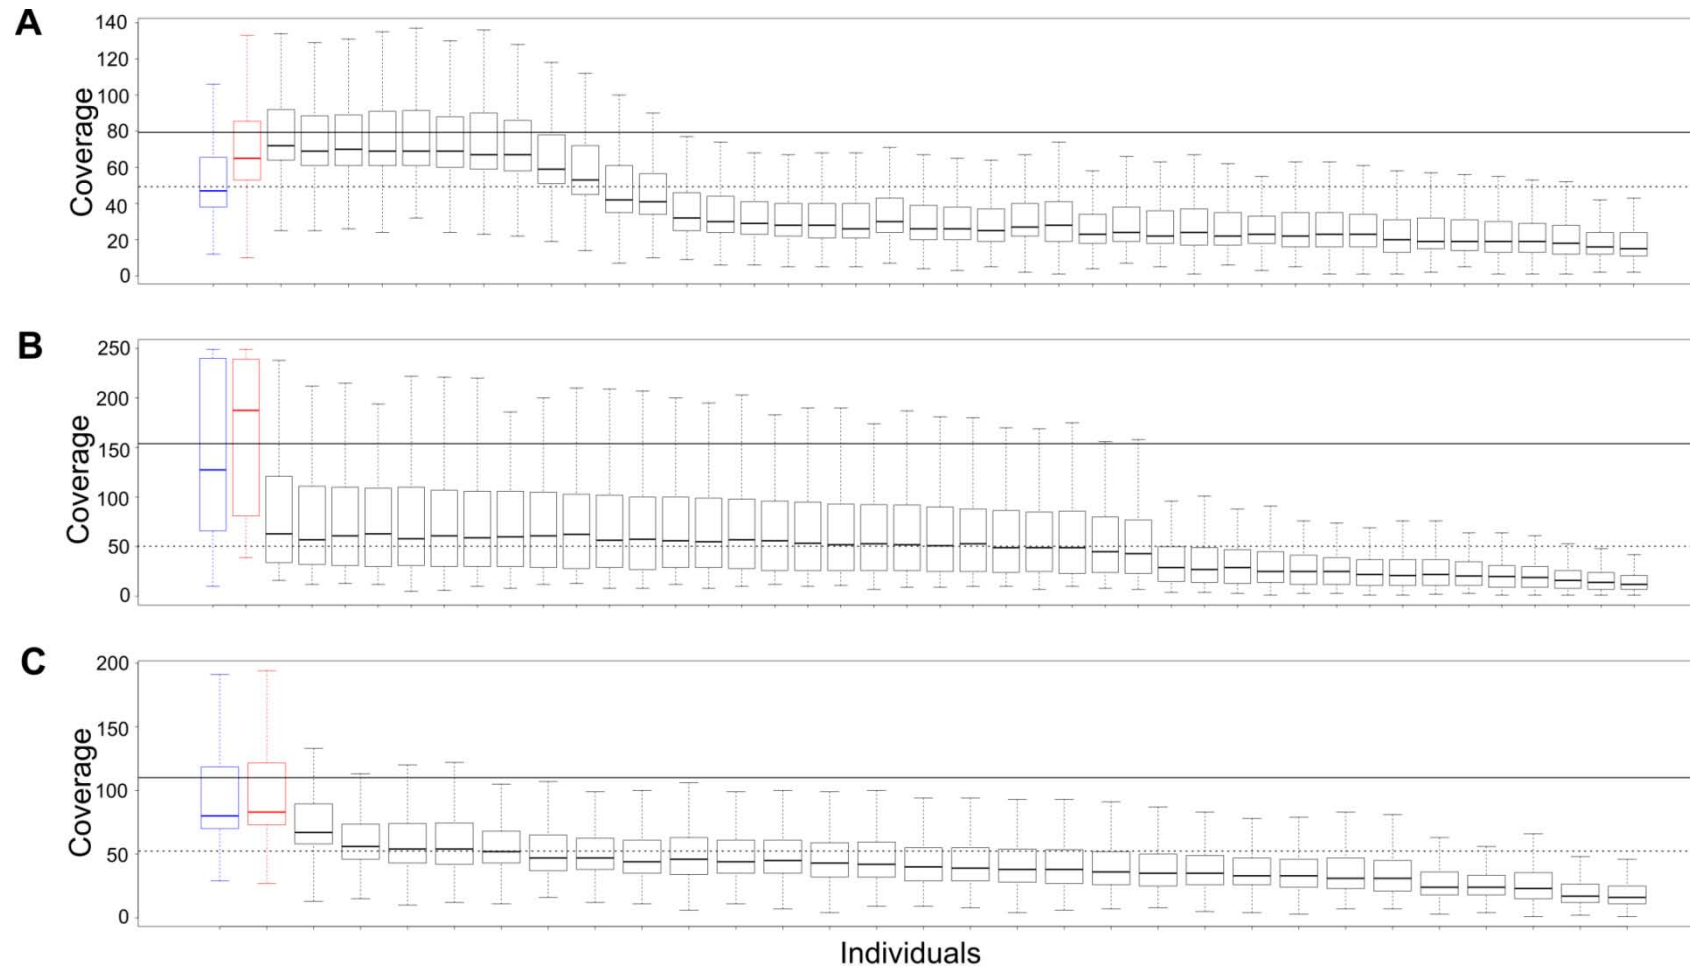

**Figure S2. Distribution of sequencing depth** across the set of good quality polymorphic SNPs for the chosen subsets of individuals in each type of cross. Box and whisker plots showing the median value and first and third quartiles (boxes), and the upper and lower extreme values (whiskers) for (A) *H. hecale melicerta* x *H. h. zuleika* (Br122), (B) *H. hecale melicerta* x *H. h. clearei* (Br112) and (C) *H. ismenius bouletti* x *H. i. telchinia* (Br96). Mean coverage for parents (solid horizontal line) and offspring (dashed horizontal line) are indicated for each family. The father (blue box) and the mother (red box) are highlighted for each cross.

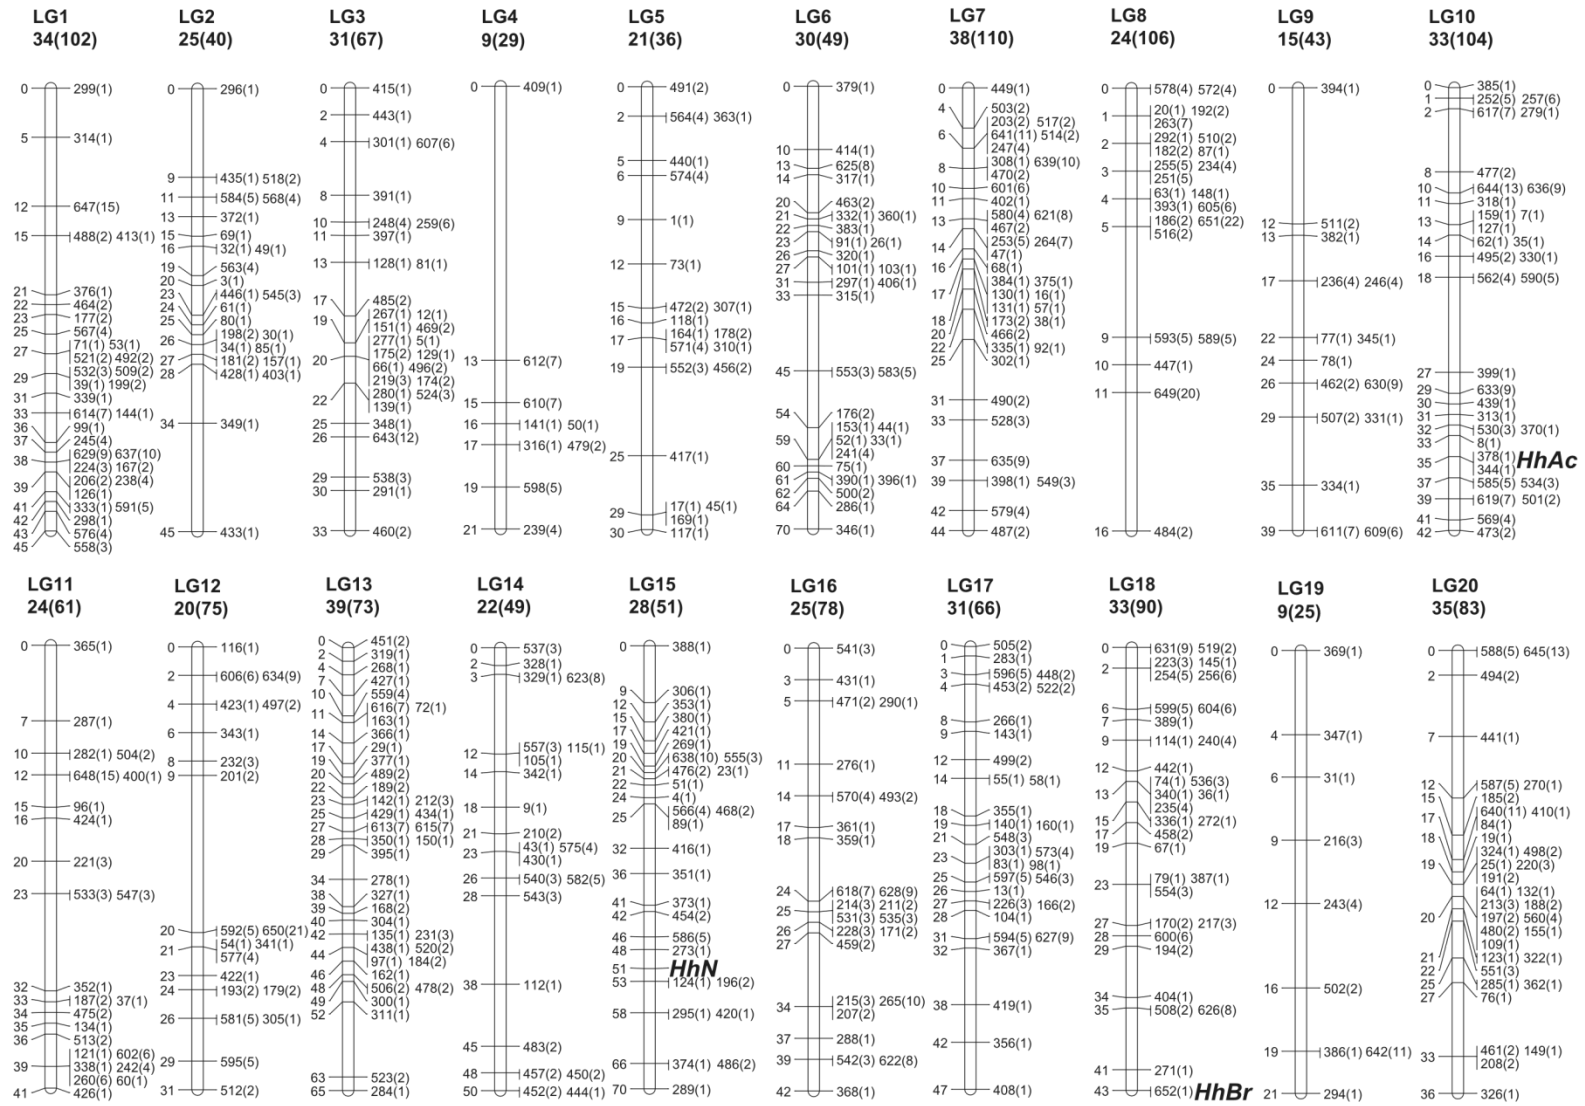

**Figure S3. Linkage map of the *Heliconius hecale* genome (20 autosomes) derived from the *H. hecale melicerta* x *H. hecale zuleika* cross.** The position of each RAD-sequencing derived marker is shown in units of recombination frequency (centimorgans). Markers were given numerical identifiers which were in turn derived from collapsing multiple supporting SNPs with identical segregation patterns (number in brackets). The total number of markers per linkage group is shown on top of each chromosome map, with the total number of SNPs in brackets. The position on the genome of wing patterning loci *HhAc*, *HhN* and *HhBr* is shown.

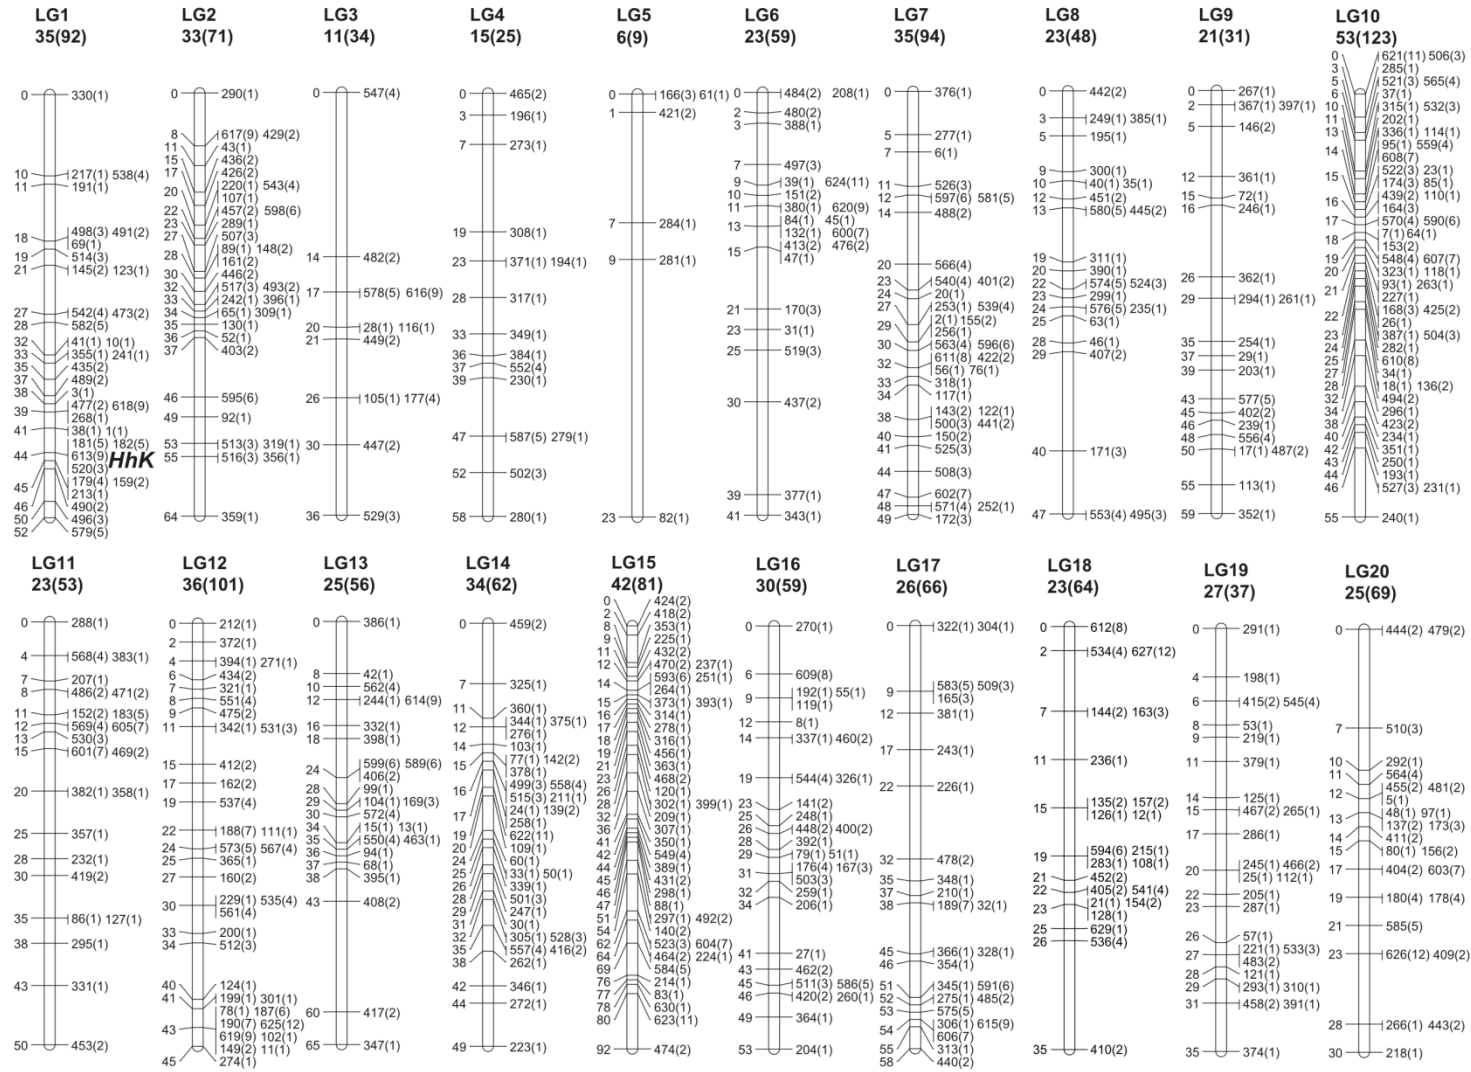

**Figure S4. Linkage map of the *Heliconius hecale* genome (20 autosomes) derived from the *H. hecale melicerta* x *H. hecale clearei* cross.** The position of each RAD-sequencing derived marker is shown in units of recombination frequency (centimorgans). Markers were given numerical identifiers which were in turn derived from collapsing multiple supporting SNPs with identical segregation patterns (number in brackets). The total number of markers per linkage group is shown on top of each chromosome map, with the total number of SNPs in brackets. The position on LG1 of the wing patterning locus *HhK* is shown.

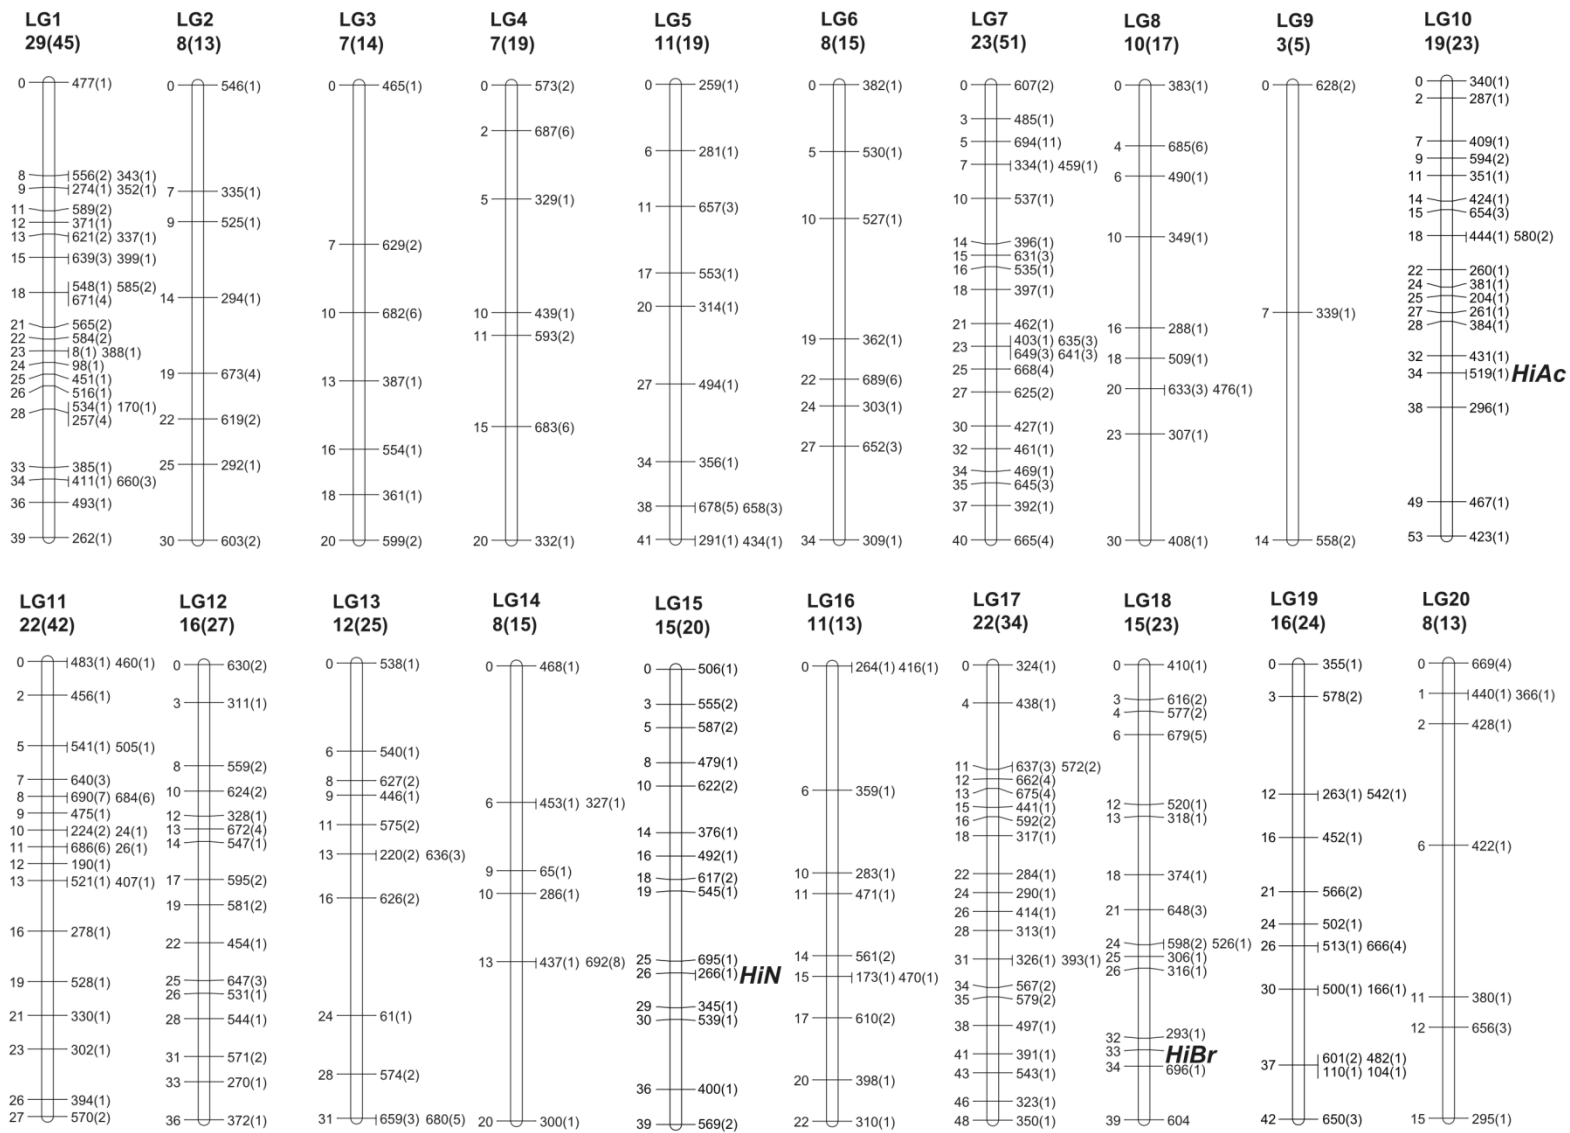

**Figure S5. Linkage map of the *Heliconius ismenius* genome (20 autosomes) derived from the *H. ismenius bouletti* x *H. ismenius telchinia* cross.** The position of each RAD-sequencing derived marker is shown in units of recombination frequency (centimorgans). Markers were given numerical identifiers which were in turn derived from collapsing multiple supporting SNPs with identical segregation patterns (number in brackets). The total number of markers per linkage group is shown on top of each chromosome map, with the total number of SNPs in brackets. The position on the genome of wing patterning loci *HiAc*, *HiN* and *HiBr* is shown.

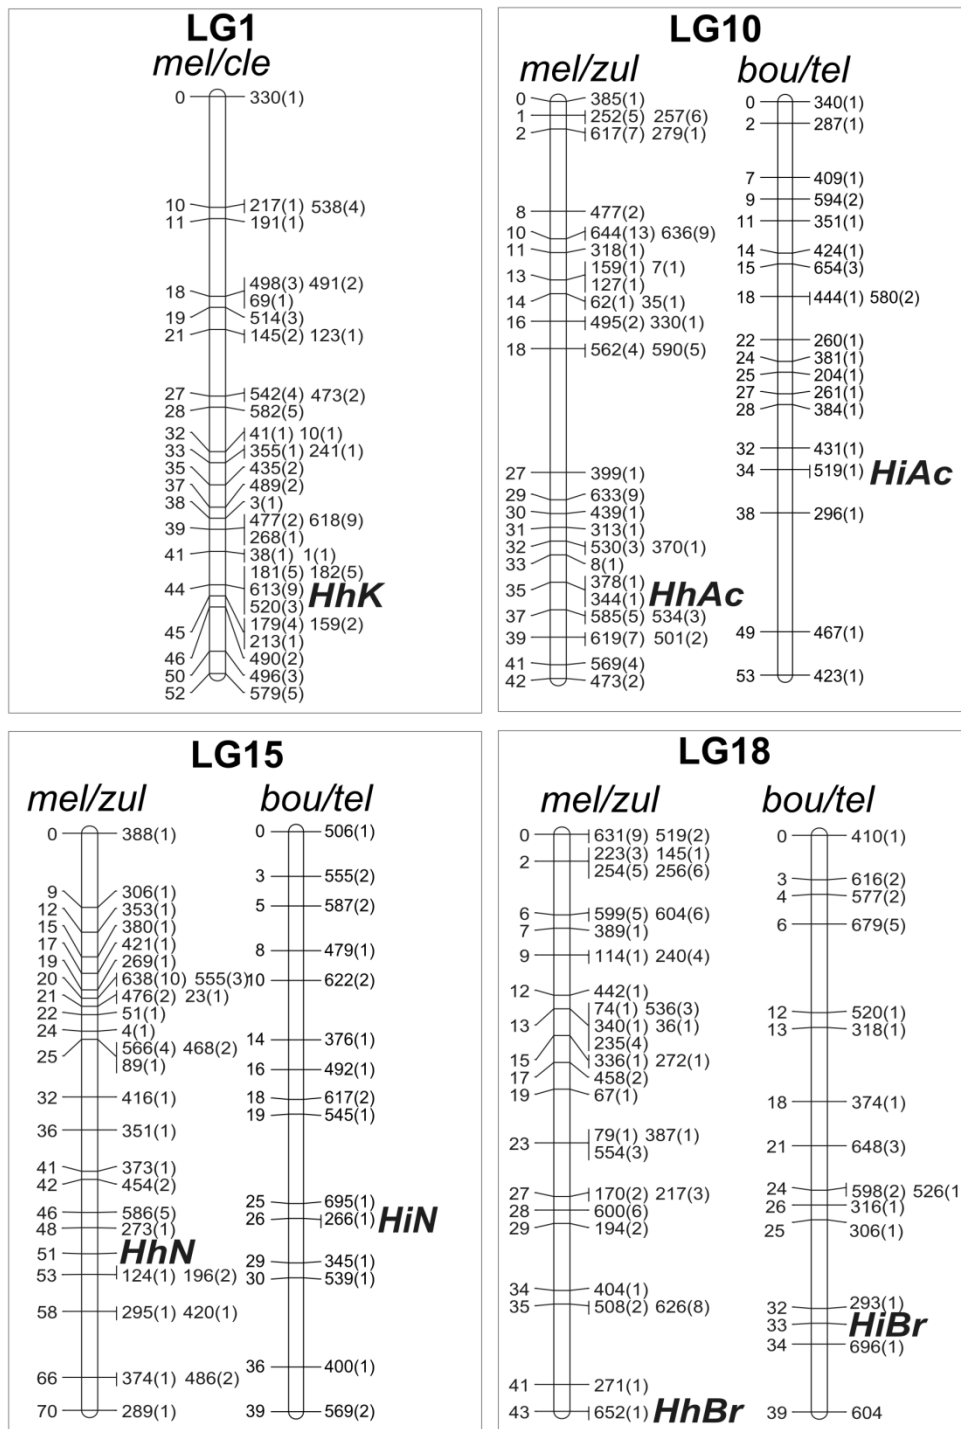

**Figure S6.** Genomic position (in centimorgans) for each colour locus on its linkage group (LG) in *H. hecale melicerta* x *H. h. clearei* (*mel/cle*), *H. hecale melicerta* x *H. h. zuleika* (*mel/zul*), and *H. ismenius bouletti* x *H. i. telchinia* (*bou/tel*) crosses. Markers are named by their segregation patterns (seg.pat.) collapsing multiple supporting RAD markers (number in brackets). Locus *HhK* maps to LG1, together with the genomic scaffold that contains gene *wingless* (HE671174; several SNPs collapsed to seg.pats. numbers 181 and 182), but also with markers on scaffolds HE670375 and HE671357 (seg.pats. 613+520 and 179+159+490, respectively). Loci *HhAc* and *HiAc* map to LG10. They cluster together with markers on the *WntA* scaffold scfHE668478 (seg.pat. 378+344 and 519). Loci *HhN* and *HiN* map to LG15, close to the *Yb-Sb-N/Cr/P* superscaffold (scfHE667780; seg.pat. 124+196 and 695). Loci *HhBr* and *HiBr* map to LG18. They cluster with markers on the scaffold containing the gene *optix*, scfHE670865 (seg.pat. 652 and 293+696).

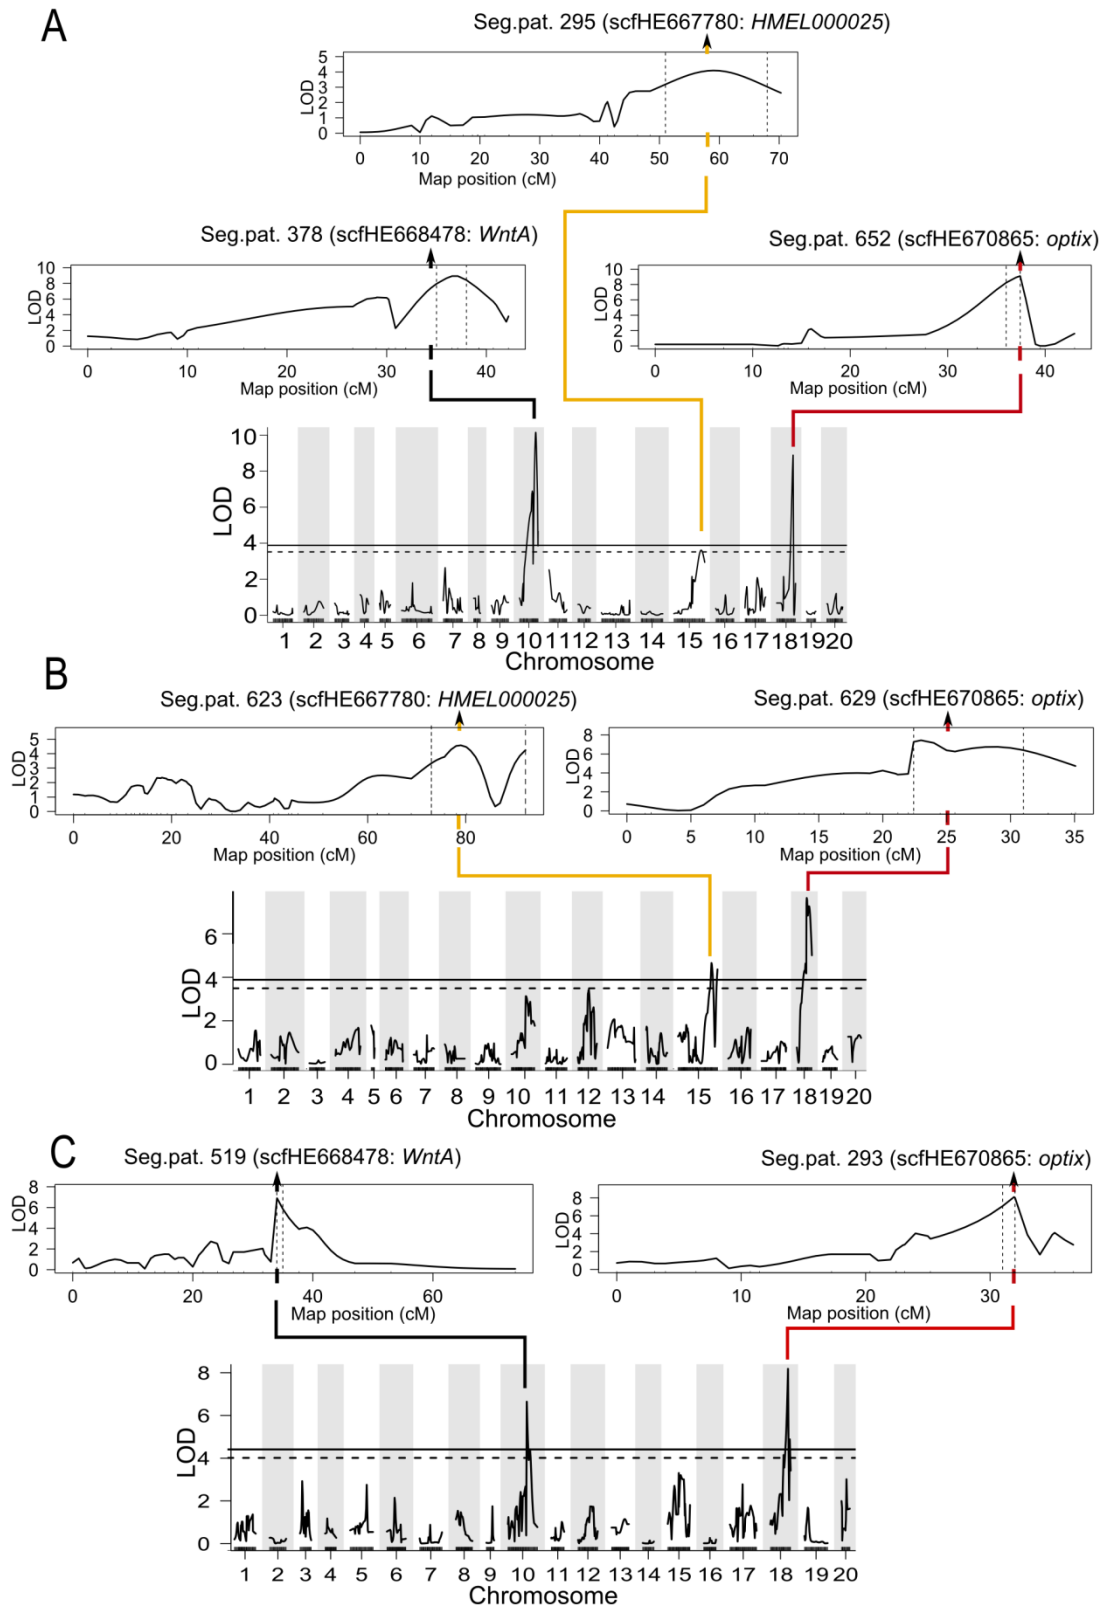

**Figure S7. Detail of QTL mapping around the highest peaks of LOD score in each cross . (A) *H. hecale melicerta* x *H. h. zuleika*, (B) *H. hecale melicerta* x *H. h. clearei* and (C) *H. ismenius bouletti* x *H. i. telchinia*. Credible intervals around the highest peak (see also Figure 3) are delimited by vertical dashed lines. *H. melpomene* genome scaffolds (scf) containing candidate colour loci (*WntA*, *HMEL000025* and *optix*) are indicated for each major QTL, with the position of the corresponding RAD marker (seg.pat.) shown by arrows. Credible intervals were determined using the *bayesint* function of R/qtl with a coverage probability of 0.95.**

**A***H. hecale melicerta* x *H. hecale clearei*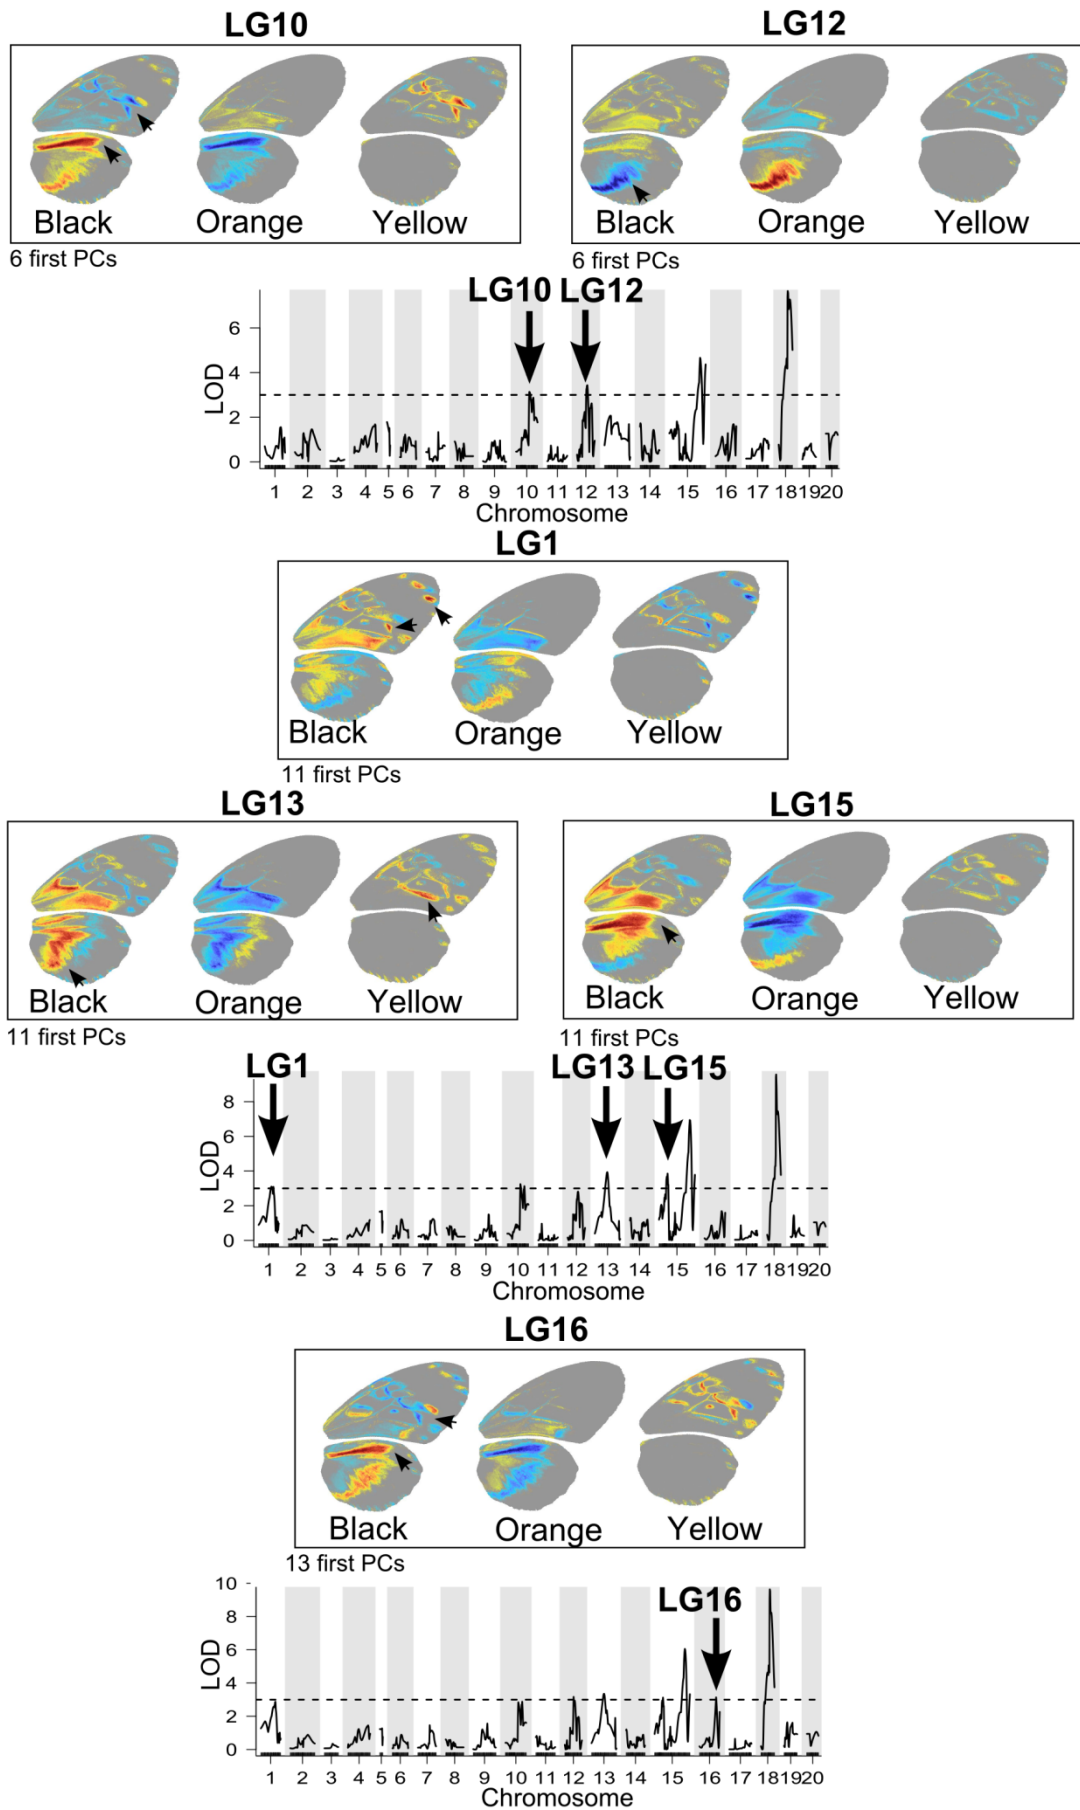



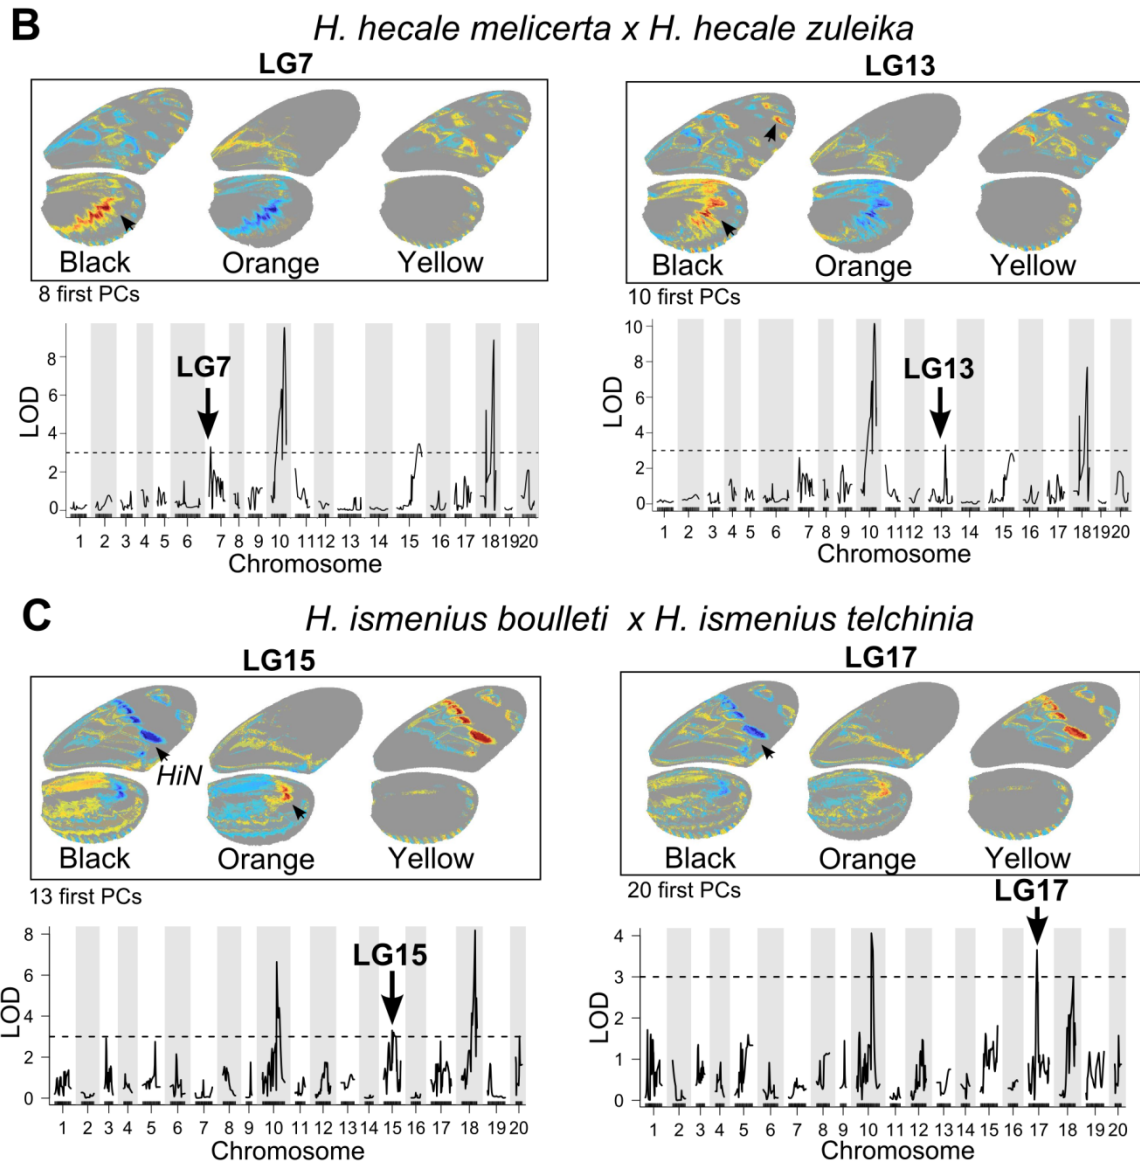

**Figure S8. Genomic position and phenotypic effect of suggestive QTLs identified in the *H. hecale* and *H. ismenius* crosses. (A) *H. hecale melicerta* x *H. h. clearei*, (B) *H. hecale melicerta* x *H. h. zuleika* and (C) *H. ismenius bouletti* x *H. i. telchinia*. Each panel illustrates the phenotypic effect of a specific QTL (upper pane) and the genome-wide association scans (lower pane) with the targeted QTL and linkage group indicated by black arrows. The subset of principal components used in each case is stated. Coloured wing diagrams show the spatial distribution of individual QTL effects on pattern variation extracted from multivariate wing pattern analysis. Phenotypic variation is broken down into heatmaps for each of the three main colours (black, orange and yellow), representing, for every wing position, the strength of association between colour presence and allelic transition at the QTL (from blue to red). For analytical simplicity purposes, both white and yellow elements in the *H. hecale melicerta* x *H. h. clearei* cross were considered as yellow elements. Genomic plots show the genome-wide association (LOD) scan between wing pattern variation and markers on the 20 autosomes, with the conventional association threshold of LOD=3 shown with an horizontal dashed line. See Table S10 for information about the approximate genomic location of each QTL.**

## REFERENCES

- Baxter SW, Johnston SE, Jiggins CD (2008a). Butterfly speciation and the distribution of gene effect sizes fixed during adaptation. *Heredity* **102**: 57–65.
- Baxter SW, Papa R, Chamberlain N, Humphray SJ, Joron M, Morrison C, *et al.* (2008b). Convergent Evolution in the Genetic Basis of Müllerian Mimicry in *Heliconius* Butterflies. *Genetics* **180**: 1567–1577.
- Broman KW, Rowe LB, Churchill GA, Paigen K (2002). Crossover interference in the mouse. *Genetics* **160**: 1123–1131.
- Broman KW, Speed TP (2002). A model selection approach for the identification of quantitative trait loci in experimental crosses. *Journal of the Royal Statistical Society: Series B (Statistical Methodology)* **64**: 641–656.
- Broman KW, Wu H, Sen S, Churchill GA (2003). *R/qtl*: QTL mapping in experimental crosses. *Bioinforma Oxf Engl* **19**: 889–890.
- Broman KW, Sen S (2009). A Guide to QTL Mapping with *R/qtl*. Springer.
- Chamberlain NL, Hill RI, Baxter SW, Jiggins CD, Kronforst MR (2011). Comparative population genetics of a mimicry locus among hybridizing *Heliconius* butterfly species. *Heredity* **107**: 200–204.
- Churchill GA, Doerge RW (1994). Empirical threshold values for quantitative trait mapping. *Genetics* **138**: 963–971.
- Counterman BA, Araujo-Perez F, Hines HM, Baxter SW, Morrison CM, Lindstrom DP, *et al.* (2010). Genomic Hotspots for Adaptation: The Population Genetics of Müllerian Mimicry in *Heliconius erato*. *PLoS Genet* **6**: e1000796.
- Emsley MG (1964). The geographical distribution of the color-pattern components of *Heliconius erato* and *Heliconius melpomene* with genetical evidence for the systematic relationship between the two species. *Zool N Y* **49**: 245–286.
- Ferguson L, Lee SF, Chamberlain N, Nadeau N, Joron M, Baxter S, *et al.* (2010). Characterization of a hotspot for mimicry: assembly of a butterfly wing transcriptome to genomic sequence at the *HmYb/Sb* locus. *Mol Ecol* **19**: 240–254.
- Gallant JR, Imhoff VE, Martin A, Savage WK, Chamberlain NL, Pote BL, *et al.* (2014). Ancient homology underlies adaptive mimetic diversity across butterflies. *Nat Commun* **5**.
- Gilbert LE (2003). Adaptive novelty through introgression in *Heliconius* wing patterns: evidence for shared genetic ‘tool box’ from synthetic hybrid zones and a theory of

- diversification. In: Boggs CL, Watt WB, Ehrlich PR (eds) *Butterflies: Ecology and Evolution Taking Flight*, Univ. of Chicago Press: Chicago.
- Haley CS, Knott SA (1992). A simple regression method for mapping quantitative trait loci in line crosses using flanking markers. *Heredity* **69**: 315–324.
- Jiggins CD, McMillan WO (1997). The genetic basis of an adaptive radiation: warning colour in two *Heliconius* species. *Proc R Soc B Biol Sci* **264**: 1167–1175.
- Jiggins CD, Mavarez J, Beltrán M, McMillan WO, Johnston JS, Bermingham E (2005). A Genetic Linkage Map of the Mimetic Butterfly *Heliconius melpomene*. *Genetics* **171**: 557–570.
- Jones RT, Salazar PA, ffrench-Constant RH, Jiggins CD, Joron M (2011). Evolution of a mimicry supergene from a multilocus architecture. *Proc Biol Sci* **279**: 316–325.
- Joron M, Papa R, Beltrán M, Chamberlain N, Mavárez J, Baxter S, *et al.* (2006). A Conserved Supergene Locus Controls Colour Pattern Diversity in *Heliconius* Butterflies. *PLoS Biol* **4**: e303.
- Kapan DD (1998). Divergent natural selection and müllerian mimicry in polymorphic *Heliconius cydno* (Lepidoptera: Nymphalidae). Doctoral dissertation, University of British Columbia.
- Kapan DD, Flanagan NS, Tobler A, Papa R, Reed RD, Gonzalez JA, *et al.* (2006). Localization of Müllerian Mimicry Genes on a Dense Linkage Map of *Heliconius erato*. *Genetics* **173**: 735–757.
- Knott SA, Haley CS (2000). Multitrait least squares for quantitative trait loci detection. *Genetics* **156**: 899–911.
- Kronforst MR, Kapan DD, Gilbert LE (2006a). Parallel Genetic Architecture of Parallel Adaptive Radiations in Mimetic *Heliconius* Butterflies. *Genetics* **174**: 535–539.
- Kronforst MR, Young LG, Kapan DD, McNeely C, O'Neill RJ, Gilbert LE (2006b). Linkage of butterfly mate preference and wing color preference cue at the genomic location of *wingless*. *Proc Natl Acad Sci* **103**: 6575–6580.
- Leamy LJ, Klingenberg CP, Sherratt E, Wolf JB, Cheverud JM (2008). A search for quantitative trait loci exhibiting imprinting effects on mouse mandible size and shape. *Heredity* **101**: 518–526.
- Linares M (1996). The Genetics of the Mimetic Coloration in the Butterfly *Heliconius cydno weymeri*. *J Hered* **87**: 142–149.

- Linares M (1997). Origin of neotropical mimetic biodiversity from a threeway hybrid zone of *Heliconius cydno* butterflies. In: H. Ulrich, Proceedings of the International Symposium on Biodiversity and Systematics in Tropical Ecosystems. Zoologisches Forschungsinstitut und Museum Alexander Koenig: Bonn, pp 93–108.
- Mallet J (1989). The Genetics of Warning Colour in Peruvian Hybrid Zones of *Heliconius erato* and *H. melpomene*. *Proc R Soc Lond B Biol Sci* **236**: 163–185.
- Manichaikul A, Dupuis J, Sen S, Broman KW (2006). Poor performance of bootstrap confidence intervals for the location of a quantitative trait locus. *Genetics* **174**: 481–489.
- Manichaikul A, Moon JY, Sen S, Yandell BS, Broman KW (2009). A model selection approach for the identification of quantitative trait loci in experimental crosses, allowing epistasis. *Genetics* **181**: 1077–1086.
- Martin A, Papa R, Nadeau NJ, Hill RI, Counterman BA, Halder G, *et al.* (2012). Diversification of complex butterfly wing patterns by repeated regulatory evolution of a *Wnt* ligand. *Proc Natl Acad Sci U S A* **109**: 12632–12637.
- Martin A, McCulloch KJ, Patel NH, Briscoe AD, Gilbert LE, Reed RD (2014). Multiple recent co-options of *Optix* associated with novel traits in adaptive butterfly wing radiations. *EvoDevo* **5**: 7.
- Nadeau N, Ruiz M, Salazar P, Counterman B, Medina JA, Ortiz-Zuazaga H, *et al.* (2014). Population genomics of parallel hybrid zones in the mimetic butterflies, *H. melpomene* and *H. erato*. *Genome Res*: gr.169292.113.
- Naisbit RE, Jiggins CD, Mallet J (2003). Mimicry: developmental genes that contribute to speciation. *Evol Dev* **5**: 269–280.
- Nijhout HF, Wray GA, Gilbert LE (1990). An analysis of the phenotypic effects of certain colour pattern genes in *Heliconius* (Lepidoptera: Nymphalidae). *Biol J Linn Soc* **40**: 357–372.
- Papa R, Martin A, Reed RD (2008). Genomic hotspots of adaptation in butterfly wing pattern evolution. *Curr Opin Genet Dev* **18**: 559–564.
- Papa R, Kapan DD, Counterman BA, Maldonado K, Lindstrom DP, Reed RD, *et al.* (2013). Multi-Allelic Major Effect Genes Interact with Minor Effect QTLs to Control Adaptive Color Pattern Variation in *Heliconius erato*. *PLoS ONE* **8**: e57033.
- Pillai KCS (1967). Upper percentage points of the largest root of a matrix in multivariate analysis. *Biometrika* **54**: 189.

- Reed RD, Papa R, Martin A, Hines HM, Counterman BA, Pardo-Diaz C, *et al.* (2011). *optix* drives the repeated convergent evolution of butterfly wing pattern mimicry. *Science* **333**: 1137–1141.
- Sheppard PM, Turner JRG, Brown KS, Benson WW, Singer MC (1985). Genetics and the Evolution of Mullerian Mimicry in *Heliconius* Butterflies. *Philos Trans R Soc Lond B Biol Sci* **308**: 433–610.
- Tobler A, Kapan D, Flanagan NS, Gonzalez C, Peterson E, Jiggins CD, *et al.* (2004). First-generation linkage map of the warningly colored butterfly *Heliconius erato*. *Heredity* **94**: 408–417.
- Turner JRG, Crane J (1962). The genetics of some polymorphic forms of the butterflies *Heliconius melpomene* Linnaeus and *Heliconius erato* Linnaeus. I. Major genes. *Zool N Y* **47**: 141–152.
- Turner JRG (1972). The genetics of some polymorphic forms of the butterflies *Heliconius melpomene* (Linnaeus) and *Heliconius erato* (Linnaeus). II. The hybridization of subspecies of *H. melpomene* from Surinam and Trinidad. *Zoologica* **56**: 125–157.
- Van Oijen JW, Voorrips RE (2001). Joinmap Version 3.0, software for the calculation of genetic linkage maps. *Plant Res Int Wagening Neth.*
